# Supplementary material for: Epigenetics of Muscle- and Brain-Specific Expression of KLHL Family Genes
Source: Int J Mol Sci. 2020 Nov 9;21(21):8394. doi: 10.3390/ijms21218394 (PMC7672584; doi:10.3390/ijms21218394)
Supplement: Supplementary file 1 [file ijms-21-08394-s001.zip]

Archive with 6 entries (6 files):
- Ehrlich_KLHL_Epigen_ Table-Suppl_Table1-Final_10_30_20.xlsx
- Ehrlich_KLHL_Epigen_ Table-Suppl_Table2-Final_10_30_20.xlsx
- Ehrlich_KLHL_Epigen_ Table-Suppl_Table3-Final_10_30_20.xlsx
- Ehrlich_KLHL_Epigen_ Table-Suppl_Table4-Final_10_30_20.xlsx
- Ehrlich_KLHL_Epigen_ Table-Suppl_Table5-Final_10_30_20.xlsx
- Ehrlich_KLHL_Epigen_SupplFigS1-S10-KLHL_RevF_10_30_20.pdf
