# Supplementary material for: Epigenetics of Muscle- and Brain-Specific Expression of KLHL Family Genes
Source: Int J Mol Sci. 2020 Nov 9;21(21):8394. doi: 10.3390/ijms21218394 (PMC7672584; doi:10.3390/ijms21218394)
Supplement: Supplementary file 1 [file ijms-21-08394-s001.zip › Ehrlich_KLHL_Epigen_ Table-Suppl_Table1-Final_10_30_20.xlsx]

## Sheet: Table S1-dis assoc
Table S1. Disease associations and protein targets of KLHL family genesa
RefSeq gene ID (alternative name) with red font for genes examined in this study	Locus coordinates (GRCh37/hg19 Assembly)	Ensemble gene ID	Number of Pubmed references to gene	Disease associationb	Some citations (PMIDsc) for disease associations	Protein target of KLHL family genes if known	References (PMIDs) for protein targets	Tissue with the highest expression	Ratio of SkM TPM to median TPM of 50 non-SkM tissuesd	Ratio of TPM brain frontal cortex to the median TPM of 40 non-brain tissues	Ratio of TPM cerebellum to median TPM of 40 non-brain tissues
ENC1 (KLHL37) (Fig. 3)	chr5:73923201-74163031	ENSG00000171617.9	56	low levels associated with invasiveness of null cell adenomas and oncocytomas	24916845	SQSTM1 (p62), NFE2L2 (NRF2)	26637326, 19424503	Brain, frontal cortex	0.288124	56.5081	0.747259
GAN (KLHL16, gigaxonin)	chr16:81348532-81424453	ENSG00000261609.3	64	giant_axonal_neuropathy	17587580, 18595793, 11062483	NFKB1 (NF-kB), ATG16L1, MAP1B, TBCB	25331947, 3077080, 2839385	Skin	0.391021	1.38689	1.9594
IPP (KLHL27)	chr1:46085715-46216488	ENSG00000197429.6	3	none	none	not known	none	Tibial nerve	1.31441	0.635252	0.694532
IVNS1ABP (KLHL39)	chr1:185126211-185336176	ENSG00000116679.11	20	none	none	HNRNPK; blocks KLHL20 binding	25619834	Salivary gland	0.466882	0.363729	0.758413
KBTBD11 (Fig. 4)	chr8:1919562-1955105	ENSG00000176595.3	7	adipocyte homeostasis; inhibits osteoclastogenesis	31844712, 30837587, 30837587	NFATC1	30837587	Brain,prefrontal cortex	0.144193	15.6523	12.1627
KBTBD12 (Fig. S4)	chr3:127634074-127706514	ENSG00000187715.9	1	none	none	not known	none	SkM	13.1953	2.70762	4.52183
KBTBD13 (Fig. S6)	chr15:65369153-65372276	ENSG00000234438.2	12	nemaline myopathy; cone-rod myopathy	30990797, 12805120, 21109227	ACTA1	31671076	Tibial artery; SkM	24.7641	0	0
KBTBD2	chr7:32524950-33102647	ENSG00000170852.6	5	diabetes	27708159	not known	none	Lung	1.06773	0.778716	1.03847
KBTBD3	chr11:105921824-105972702	ENSG00000182359.10	1	none	none	not known	none	Brain,cerebellum	0.460987	1.025	2.1496
KBTBD4	chr11:47486879-47606114	ENSG00000123444.9	5	none	none	not known	none	Brain,cerebellum	1.07574	0.802958	1.90254
KBTBD6	chr13:41701613-41837943	ENSG00000165572.6	3	diabetic retinopathy	30982432	not known	none	Brain,cerebellar hemisphere	0.395655	3.41886	4.9655
KBTBD7	chr13:41701613-41837943	ENSG00000120696.8	8	cardiac dysfunction	29991775	TIAM1	25684205	Brain,cerebellar hemisphere	0.375115	1.82241	2.81659
KBTBD8	chr3:67048713-67061698	ENSG00000163376.7	7	Treacher_Collins_syndrome_1; oocyte quality	30786262	NOLC1, TCOF1	26399832	Testis	0.879981	2.4538	3.34931
KEAP1 (KLHL19 ) (Fig. 3)	chr19:10596795-10614054	ENSG00000079999.9	2764	hepatocellular carcinoma, lung carcinoma, lung adenocarcinoma, goiter	31953436, 31751303, 31839815, 27703446	NFE2L2 (NRF2)	29499228	SkM	2.43936	0.796416	1.07595
KLHL1 (MRP2)	chr13:70274725-70705678	ENSG00000150361.7	32	spinocerebellar ataxia	25610372	CACNA1H, MRP2	31969803, 16982692	Brain,substantia nigra	#DIV/0!	#DIV/0!	#DIV/0!
KLHL10	chr17:39981334-40004636	ENSG00000161594.6	16	male infertility	17047026	BIRC6 (Bruce)	20643358	Testis	0.254317	0.624844	1.18301
KLHL11	chr17:40004762-40021684	ENSG00000178502.5	9	seminoma-associated paraneoplastic encephalitis	31269365	not known	none	Testis	1.90087	0.756836	1.88115
KLHL12	chr1:202860117-202897764	ENSG00000117153.11	26	biliary cirrhosis, cranioenticulosutural dysplasia	26717573, 31001269	DRD1,2,3,4 (dopamine receptors)	27068976	Testis	0.489953	1.17833	1.15601
KLHL13	chrX:117031763-117251303	ENSG00000003096.9	9	squamous cell carcinoma,	28620047	IRS1	31515271	Uterus	0.320179	0.665014	0.962516
KLHL14	chr18:30252633-30354376	ENSG00000197705.5	7	thyroid cancer	31558562	TOR1A	29045835	thyroid	0.0661546	1.59918	0.112788
KLHL15	chrX:24001836-24045303	ENSG00000174010.9	7	mental retardation	27561354, 24817631	RBBP8; PPP2R5B	27561354, 23135275	Testis	0.738982	0.789675	1.24604
KLHL17	chr1:860259-917497	ENSG00000187961.9	3	none	none	GLUR6	17062563	Brain,cerebellum	0.190098	0.601763	2.31031
KLHL18	chr3:47057766-47392586	ENSG00000114648.7	5	none	none	AURKA	23213400	skin	0.673111	0.895316	1.71725
KLHL2 (Mayven) (Fig. S9)	chr4:165991736-166244308	ENSG00000109466.9	23	pseudohypoaldosteronism, arts syndrome, cold-induced sweating syndrome	29869755	WNK4, NPTXR	23838290	Brain,nucleus accumbens	0.188451	3.18588	1.45316
KLHL20	chr1:173675398-173757553	ENSG00000076321.6	24	cholestasis	31279627	PML, DAPK1, ULK1	31279627, 26985984	Cervix - Endocervix	0.706289	0.382138	0.691732
KLHL21 (Fig. S10)	chr1:6650621-6684093	ENSG00000162413.12	6	hepatocellular carcinoma	27769251, 29574153	IKBKB	27387502	SkM	3.25661	0.553256	0.733076
KLHL22	chr22:20778872-20946505	ENSG00000099910.12	9	tumorigenesis	29769719	PLK1, CRTC1	29769719	Brain,cerebellum	0.716903	1.62091	2.95502
KLHL23	chr2:170550974-170633499	ENSG00000213160.5	4	cone-rod dystrophy; gastric cancer	27833855, 21496248	ACTA1	29171033	Colon	0.529249	1.77193	1.64659
KLHL24 (KRIP6)	chr3:183353193-183399321	ENSG00000114796.11	17	cardiomyopathy, epidermolysis bullosa	31649980, 30715372, 20301543, 27889062, 27798626	KRT genes, GRIK2 (GluR6)	27798626	Lung	1.64004	0.521493	1.06922
KLHL25	chr15:86302553-86338261	ENSG00000183655.11	4	inhibits tumor progression-lung cancer	27664236	ACLY	27664236	Testis	0.63156	0.788342	0.748602
KLHL26	chr19:18747803-18782709	ENSG00000167487.7	1	none	none	not known	none	Tibial artery	0.584119	1.5999	2.23185
KLHL28	chr14:45393549-45431213	ENSG00000179454.9	0	none	none	not known	none	Tibial nerve	0.704961	0.666929	1.11593
KLHL29	chr2:23608087-23937084	ENSG00000119771.10	6	none	none	not known	none	Tibial nerve	0.973638	0.9829	1.00583
KLHL3	chr5:136953136-137127816	ENSG00000146021.10	85	pseudohypoaldosteronism	22073419, 24821705, 22073419	WNK4	23453970	Brain,cerebellum	0.193557	1.38091	13.4788
KLHL30 (Fig. 2)	chr2:239047362-239061588	ENSG00000168427.7	3e	none	none	not known		SkM	144.789	0.0376933	0.430637
KLHL31 (Fig. S2)	chr6:53512698-53530506	ENSG00000124743.5	7	congenital myopathy	28872460, 25796573, 19643178	TRE; SRE	18719355	Heart	58.6357	0.31781	0.187168
KLHL32 (Fig. 4)	chr6:97372495-97588630	ENSG00000186231.12	4	none	none	not known	none	Brain,spinal cord	0.407712	36.6059	38.7357
KLHL33 (Fig. S1)	chr14:20896969-20903801	ENSG00000185271.6	2	none	none	not known	none	SkM	23.62	0.203029	2.54195
KLHL34 (Fig. S3)	chrX:21673608-21676448	ENSG00000185915.4	2	pathologic response to preoperative radiation therapy in rectal cancer	25680604	not known	none	SkM	113.421	13.0619	35.96
KLHL35 (Fig. S9)	chr11:75110529-75141674	ENSG00000149243.11	6	none	none	not known	none	Testis	0.212458	8.00066	5.95399
KLHL36	chr16:84682106-84701431	ENSG00000135686.8	3	none	none	not known	none	Testis	0.301713	0.323073	0.711488
KLHL38 (Fig. 2; S8)	chr8:124626464-124670810	ENSG00000175946.8	3	reversion of muscle atrophy	30639329	not known	none	SkM	405.409	1.62057	0
KLHL4 (Fig. S9)	chrX:86772751-86925050	ENSG00000102271.9	8	cleft palate	11499681	not known	none	Adrenal gland	0.104693	10.3067	2.85741
KLHL40 (KBTBD5) (Fig. 1; S5)	chr3:42727010-42734036	ENSG00000157119.11	18	nemaline myopathy	31228046, 23746549, 20301465	TFDP1	25940086, 25940086	SkM	3372.98	0.919053	0.939855
KLHL41 (KBTBD10) (Fig. 1)	chr2:170335687-170382773	ENSG00000239474.2	18	nemaline myopathy	30986853, 24268659, 20301465	NRAP	30986853	SkM	1945.76	0.808957	2.54957
KLHL42 (KLHDC5)	chr12:27932020-27955975	ENSG00000087448.5	1	systemic scleroderma	32071084	KATNA1	19261606	Aorta	0.114907	1.30008	1.47901
KLHL5	chr4:39046402-39145138	ENSG00000109790.12	6	none	none	SPHK1	31652307	Colon	0.228151	1.20545	1.06189
KLHL6	chr3:183205318-183273706	ENSG00000172578.7	30	tumor suppression-lymphoma	30646831	CDK2	29720484	Spleen	0.230658	0.158347	0.124737
KLHL7	chr7:23140516-23240687	ENSG00000122550.13	27	retinitis pigmentosa; cold-induced sweating syndrome	31856884, 31497877	TUT1	29032201	Testis	0.539599	1.3683	1.6714
KLHL8	chr4:88081036-88161466	ENSG00000145332.9	4	prostate cancer	27358489	RAPSN	19158078	Thyroid	1.85299	0.918505	0.888808
KLHL9	chr9:21319787-21335533	ENSG00000198642.5	11	distal myopathy	20554658	IRS1, AURKB	31515271, 19995937	Cervix	0.269519	0.712994	1.05316
aKLHL and KBTBD genes are referred to as KLHL family genes
bDisease associations are shown only for causative associations that have been confirmed, not for genome-wide association studies (GWAS)
cPubmed accession number (https://pubmed.ncbi.nlm.nih.gov/)
dThe RNA-seq data are from the GTEx database (https://www.gtexportal.org/home/); TPM, transcripts per million; see Table S2
eThe references had only a tangential mention of the indicated gene
