# Supplementary material for: Epigenetics of Muscle- and Brain-Specific Expression of KLHL Family Genes
Source: Int J Mol Sci. 2020 Nov 9;21(21):8394. doi: 10.3390/ijms21218394 (PMC7672584; doi:10.3390/ijms21218394)
Supplement: Supplementary file 1 [file ijms-21-08394-s001.zip › Ehrlich_KLHL_Epigen_ Table-Suppl_Table2-Final_10_30_20.xlsx]

## Sheet: TableS2-GTEx
Table S2. Expression levels of KLHL family genes in 52 human tissues and in six types of culturesa
	Expression in 52 human tissues: Median TPM
RefSeq gene ID (alternative name) with red font for genes examined in this study	Adipose - Subcutaneous	Adipose - Visceral (Omentum)	Adrenal Gland	Artery - Aorta	Artery - Coronary	Artery - Tibial	Bladder	Brain - Amygdala	Brain - Anterior cingulate cortex (BA24)	Brain - Caudate (basal ganglia)	Brain - Cerebellar Hemisphere	Brain - Cerebellum	Brain - Cortex	Brain - Frontal Cortex (BA9)	Brain - Hippocampus	Brain - Hypothalamus	Brain - Nucleus accumbens (basal ganglia)	Brain - Putamen (basal ganglia)	Spinal cord (cervical)	Brain - Substantia nigra	Breast - Mammary Tissue	Cervix - Ectocervix	Cervix - Endocervix	Colon - Sigmoid	Colon - Transverse	Esophagus - Gastroesophageal Junction	Esophagus - Mucosa	Esophagus - Muscularis	Fallopian Tube	Heart - Atrial Appendage	Heart - Left Ventricle	Kidney - Cortex	Kidney - Medulla	Liver	Lung	Minor Salivary Gland	Muscle - Skeletal	Nerve - Tibial	Ovary	Pancreas	Pituitary	Prostate	Skin - Not Sun Exposed (Suprapubic)	Skin - Sun Exposed (Lower leg)	Small Intestine - Terminal Ileum	Spleen	Stomach	Testis	Thyroid
ENC1 (KLHL37)	4.78957	5.76261	2.77556	2.94	6.27911	2.51449	14.7007	76.4055	142.502	28.4855	4.41302	4.2619	189.851	322.287	86.5273	18.1356	36.2302	21.4846	2.80134	4.07792	7.69274	3.61967	4.6102	4.92086	10.849	4.19691	5.11842	4.68371	3.37463	4.82407	2.53065	3.29149	8.21103	7.26593	11.2952	24.9895	1.80916	4.21635	27.643	14.3402	11.8074	20.7037	6.01048	7.19176	18.8334	11.3657	15.1051	19.1271	4.86829
GAN (KLHL16, gigaxonin)	2.40337	2.2284	1.20469	2.35763	2.17701	2.47143	3.42452	3.0004	3.63849	2.77782	5.81689	5.34673	3.08462	3.78448	2.92441	3.28748	2.99196	2.18653	2.95905	2.99521	2.62779	4.14969	3.28776	4.35475	3.14302	3.01223	8.06629	3.15161	3.33344	1.18574	1.02958	0.802088	1.2575	0.778865	2.98789	3.83348	1.16992	4.10337	3.0554	0.870166	2.91959	3.93525	31.2137	30.9602	2.27969	1.65497	2.41694	2.48025	2.72876
IPP (KLHL27)	5.11704	4.08225	4.9136	5.31325	5.23315	6.68565	7.08419	2.58007	2.73695	3.10577	3.91153	3.55395	2.67565	3.25061	2.528	3.37461	3.06493	2.45659	5.00355	3.15089	5.05482	6.64505	6.77242	5.58237	4.28481	5.36665	4.65312	5.50815	6.81133	3.04115	2.25142	2.4372	3.40138	1.8563	4.07206	4.88717	6.1161	8.59806	7.59842	2.29773	4.89337	5.33423	5.05297	5.35689	4.31143	2.81719	3.70959	13.2412	7.10714
IVNS1ABP (KLHL39)	48.996	72.9943	21.6336	30.5886	37.507	28.9785	43.8916	14.1695	12.5636	26.7781	37.7559	36.4334	16.1569	17.4732	17.3025	18.5322	18.5916	31.5167	31.6309	19.6763	56.9891	60.5477	48.039	24.9377	40.8061	22.6158	49.3188	22.5579	46.868	20.8533	18.1151	61.8585	115.389	16.8236	73.2789	115.208	18.7562	69.6137	49.9894	20.1339	48.7294	56.5293	76.2065	74.41	46.4652	58.864	47.7769	39.216	69.215
KBTBD11	5.74806	4.2305	9.39559	1.0044	2.13526	2.93702	3.5126	28.7461	42.6815	29.7281	55.9071	45.6496	48.2456	58.7471	26.8838	22.5547	35.9106	23.1148	30.3925	24.0215	5.01792	3.75326	3.8236	5.89317	11.2573	3.46172	1.55551	4.3195	6.2546	1.35148	1.8453	10.0091	14.2364	5.28311	6.05272	2.13872	0.761787	4.97746	2.83773	2.63807	7.41098	5.15391	2.16954	2.66923	14.3639	14.6777	2.75806	3.16789	9.6303
KBTBD12	0.457731	0.503276	0.229325	2.94598	3.10351	3.01497	1.42023	1.3007	1.49923	2.39398	3.81146	3.63246	2.16682	2.17508	1.1272	0.588379	2.27044	1.46076	0.445548	0.502362	0.30584	0.275846	0.690767	3.16927	1.74622	3.45751	0.179774	3.44871	1.48205	1.77591	7.78932	1.07288	1.25098	0.0215533	0.385094	2.64747	14.8737	0.634912	0.216494	2.42404	0.9681	0.280116	0.279304	0.292737	0.803317	0.0599572	2.56673	2.96528	0.15512
KBTBD13	0.272065	0.0659895	0	0.830111	0.396546	2.62126	0.192476	0	0	0	0	0	0	0	0	0	0	0	0	0	0.134059	0.319561	0.412399	0.0473101	0.0630109	0.0648662	0	0.0587338	0.410444	0.651017	0.742281	0.025474	0.0476191	0	0.0804956	0.0251285	1.45449	0.168709	0.0881707	0	0	0.155927	0.0447291	0.104674	0.069896	0.0626706	0	0.772705	0.105169
KBTBD2	38.7503	39.0753	17.4006	28.1416	29.8281	31.9467	26.4834	11.8298	13.6574	13.4744	35.4636	27.1304	15.3561	20.3442	12.3125	17.1601	13.2237	12.3072	29.1437	16.5162	34.4272	32.9087	33.957	26.7867	20.1575	24.2022	20.654	24.5457	30.9161	12.6613	10.497	10.7563	18.8617	8.52921	40.8238	19.9125	26.1253	39.2677	30.9542	6.65371	24.4681	24.7883	23.6703	24.2119	24.8816	39.2644	16.1907	27.4059	36.9638
KBTBD3	2.59291	1.82153	2.19348	3.63528	3.25572	3.27116	2.71389	1.94832	1.95253	2.47229	5.4764	5.57372	2.24729	2.65774	2.48137	2.22363	2.27695	2.40158	4.88865	2.53713	2.83019	3.57947	3.71239	3.00824	1.96359	3.04157	1.60502	3.41337	3.75025	1.54407	1.32779	1.89057	2.30496	0.879425	2.4109	2.46633	1.14388	4.85602	3.8285	1.50385	5.24177	2.94901	2.1775	2.12291	2.21812	2.13661	1.83039	5.01122	3.66197
KBTBD4	9.18998	5.98898	10.777	9.63252	8.42724	11.4136	10.5503	3.32431	4.53708	5.5938	16.3437	16.5635	7.1231	6.99054	3.43223	4.80502	5.99042	4.45919	4.10954	3.17146	9.04417	8.65997	11.4686	9.9265	6.66802	10.4834	6.68074	10.6248	11.5877	3.37924	3.53342	3.48568	5.63059	2.39368	8.34533	8.01657	8.70598	11.1266	10.9181	2.91918	11.0934	7.50103	9.18141	10.5407	8.09301	8.37712	6.21699	16.3028	9.29846
KBTBD6	3.61108	3.37343	6.77003	5.03249	5.10958	3.74036	5.2521	9.04471	10.8336	8.74146	30.1336	20.8844	9.25463	14.3794	8.79409	16.5415	12.4068	7.04696	9.45089	8.03581	4.05515	9.41525	9.40215	5.80275	3.61264	5.01814	3.14653	5.00725	10.716	3.36705	2.35376	2.20455	3.59615	2.5075	3.37198	3.1183	2.20746	7.23541	5.57926	2.15977	13.3925	5.58832	2.87638	2.80111	4.2059	5.08864	3.08078	8.82103	5.82018
KBTBD7	2.95881	2.11497	4.40682	4.05404	3.89586	2.95219	4.01649	3.3681	4.26796	3.86549	13.1316	9.48739	4.12281	6.13858	3.45629	4.57307	4.1144	3.11256	3.98118	3.02195	3.16136	3.17567	4.50724	3.87861	3.0445	3.75485	2.80117	3.83946	4.3364	1.69649	1.41523	1.64545	2.7475	2.91164	2.7304	3.92888	1.44024	4.78721	4.01126	2.06924	6.74386	4.35225	2.66057	2.7021	3.36839	5.31095	3.44917	7.64393	5.33698
KBTBD8	0.342215	0.625755	0.449067	0.629916	0.754658	0.20288	0.948132	0.595768	0.825855	1.04466	2.40818	1.94102	1.04352	1.42205	0.654604	0.981289	1.36559	0.905389	0.905002	0.778992	0.400657	0.168277	0.200817	0.553987	1.01442	0.848782	1.00302	0.906928	0.490214	1.41881	1.10776	0.245615	0.452794	0.446546	1.90467	0.8675	0.664085	0.327608	0.205834	0.259962	1.08385	0.471441	0.362995	0.225988	2.30649	6.80841	0.979066	8.06558	0.579529
KEAP1 (KLHL19 )	38.1644	31.9132	37.5018	42.3349	38.0601	37.8256	51.9146	19.7146	23.4531	22.871	44.0193	40.6983	29.0657	30.1249	20.7358	26.9932	23.717	21.3843	39.7786	25.7292	36.2117	48.5047	54.427	42.7324	31.8262	41.2959	50.7641	41.9005	43.4659	21.4315	22.615	16.4678	18.5452	21.2222	35.7935	36.6639	88.3333	42.4149	36.3528	12.6808	34.9408	44.006	41.7167	44.6705	28.5421	34.0948	26.4446	31.1007	49.6352
KLHL1 (MRP2)	0	0	0	0	0	0	0	0.831688	1.04872	0.850461	1.35347	3.82718	0.588116	0.878287	0.439735	5.83152	1.5575	0.535595	0.711993	7.14547	0	0	0	0.136448	0.0570874	0.0329743	0	0.0301862	0	0	0	0.0118783	0.026691	0	0	0	0	0	0	0.0225759	0.47956	0.0113319	0	0	0	0	0.0408128	0.277296	0
KLHL10	0.75466	0.50094	0.251931	0.883722	1.09779	1.42821	1.22247	0.118716	0.188951	0.304372	0.613749	0.683857	0.40159	0.361201	0.11139	0.153948	0.368573	0.202618	0.103376	0.0930569	0.752574	0.754282	0.86531	1.5328	0.560355	2.03602	0.391136	2.25523	1.18393	0.193803	0.0838489	0.258048	0.49607	0.164878	0.485935	0.429703	0.126159	0.708315	1.04212	0.234589	0.707617	1.15471	0.377282	0.37891	0.519838	0.392868	0.380906	119.405	1.60764
KLHL11	1.85362	1.39225	1.67045	1.77607	2.04545	2.14586	2.96473	0.579597	0.915224	0.713236	3.69441	3.51112	1.26999	1.41262	0.642196	1.15898	0.935906	0.547892	1.0552	0.587835	1.79422	1.77454	2.74165	3.62315	1.66359	3.44326	1.63637	3.83474	3.69492	1.9584	1.50524	0.450212	0.405657	0.466954	1.86648	1.98889	3.30493	4.01104	2.59374	0.80648	1.60306	1.57192	2.51098	2.09273	2.25767	1.05024	1.44688	24.0454	2.54694
KLHL12	24.6002	19.1134	22.4378	23.2142	23.8178	24.5479	28.2753	12.7734	18.2214	15.0712	30.5206	26.2827	20.6778	26.7902	12.7602	20.4587	16.1872	12.1305	18.2052	14.2922	22.9411	28.7624	27.748	23.441	20.7093	21.5624	22.0856	22.7358	28.73	11.8744	9.87266	13.9571	16.2752	9.6871	22.5504	19.5482	10.8209	32.7801	29.1122	10.5879	26.9665	26.5419	20.0647	21.8682	21.0258	27.1648	16.0921	66.4294	29.5648
KLHL13	1.64168	1.45666	2.85875	3.8029	2.42608	4.81972	6.34281	1.66328	1.62205	6.04037	2.52167	2.11076	1.06127	1.45835	1.3264	3.33974	5.94625	3.82152	1.19227	2.23119	3.20371	12.513	16.1273	4.6531	2.19296	5.29977	1.81653	4.6903	6.82001	1.51501	1.20342	3.65438	5.90838	0.403286	0.910606	1.49972	0.70214	3.39067	4.56009	1.0758	1.82876	3.50915	0.668851	0.865596	2.03871	0.536641	1.09649	1.92024	0.79857
KLHL14	0.521041	0.70099	0.123681	0.0642228	0.145992	0.0247468	0.485827	0.177427	0.340587	0.0803822	0.04041	0.0442704	0.605769	0.627694	0.197692	0.21845	0.0681771	0.0275535	0.0903019	0.155494	0.856372	1.65151	3.65455	0.18887	0.238094	0.315623	0.298827	0.261099	3.35648	0.0247166	0.0315452	2.09213	6.06822	0.0342419	0.396633	0.0685002	0.0172729	0.634678	0.544449	0.0164828	0.392511	1.87599	0.116206	0.131478	1.68009	11.6345	0.15284	1.40645	18.2369
KLHL15	4.23292	5.94832	8.92672	5.68799	4.936	5.63248	3.73671	2.16895	2.36549	3.09064	6.44912	5.29308	2.57236	3.35447	2.10654	3.0273	3.02541	2.28355	3.09244	1.84046	4.175	4.80985	5.5025	5.53226	3.55217	6.82109	3.58759	6.00267	8.74927	2.45897	1.77244	1.5538	3.52917	3.8844	5.30555	3.61126	2.8705	5.40159	9.6771	2.46776	6.76784	4.55045	3.38379	3.17627	4.24791	4.01973	3.63814	22.2194	5.69607
KLHL17	9.6782	8.96775	7.89155	13.9174	13.3924	10.7404	17.6089	3.04849	5.05848	4.41043	24.0442	29.4899	10.3953	7.6812	4.09669	5.4494	4.35202	4.021	4.05073	3.49978	11.7211	20.6632	24.6286	12.6209	10.0912	12.838	17.3401	13.0437	14.4333	4.61745	2.81872	8.87554	12.6445	5.68244	15.7378	12.7645	2.22816	9.30667	3.47966	4.77177	20.749	17.1106	16.2588	16.5169	12.4869	21.2398	10.3608	30.7975	15.2282
KLHL18	10.2438	9.83075	8.83635	12.5884	11.8423	13.2285	12.3762	4.11979	6.04646	5.91787	20.9802	19.8277	10.5569	10.3375	4.27165	6.56134	7.10872	4.39799	5.06542	4.09673	9.56264	13.9481	12.7274	11.5462	8.49818	11.188	12.289	11.7897	11.3397	6.01728	5.28213	4.77642	9.65262	2.80742	12.158	7.69406	6.95829	12.4132	9.17496	3.31841	13.3952	11.5876	20.8649	25.2745	9.9379	16.9241	6.71312	14.8899	17.3867
KLHL2 (Mayven)	17.0668	17.1829	15.8394	20.8786	16.8924	22.5365	13.9674	31.9975	33.2861	45.7426	25.2129	21.2216	34.1971	46.5259	46.6837	28.9249	55.7584	38.6544	53.5638	35.2692	19.6015	12.6147	12.824	12.2911	8.44477	14.6038	25.4682	15.9281	17.1567	5.01629	3.36342	9.22205	11.4679	12.1285	26.3412	26.0829	3.21626	23.0976	8.28579	4.29734	31.0443	13.524	10.7067	11.3678	9.98384	27.5074	10.773	8.71035	19.1611
KLHL20	17.9763	14.4406	10.165	17.4494	17.3741	21.1633	14.4922	3.8301	4.08488	5.78843	11.8629	9.55482	4.34359	5.27844	4.70951	5.24681	5.36932	4.74862	8.2915	5.2171	14.8706	20.2717	19.2921	16.0042	9.73172	14.0625	9.44774	13.8129	16.5829	7.10492	4.00539	4.41216	5.85633	5.52414	13.2955	8.99195	7.17943	19.4072	16.7823	3.31152	9.33139	14.6578	10.8032	11.9418	10.5365	9.7045	6.03103	20.4171	15.1775
KLHL21	31.9696	25.7486	29.806	73.983	55.1888	71.4168	55.2628	11.6328	14.91	14.7488	21.9363	25.7147	22.9634	19.407	13.2206	15.1229	16.3254	11.9205	18.1233	13.4826	33.4336	36.2683	40.0308	57.8391	22.5802	60.4891	35.1681	60.5094	35.6553	32.5531	23.5678	13.3471	20.5147	9.57008	24.2973	29.1394	83.8532	42.268	43.8521	16.1302	40.9898	44.4962	41.2345	44.6582	17.307	21.8054	23.5572	25.1153	29.2205
KLHL22	15.6699	11.5705	13.3078	13.4272	12.6001	13.2791	16.309	11.599	15.8313	13.8593	40.0521	39.3248	20.657	21.5708	12.2596	14.7104	16.4715	11.5789	8.5625	9.65766	14.0558	28.8247	30.6184	19.1892	9.98937	15.957	5.80194	15.7501	22.6463	8.09623	5.53042	7.9715	9.21936	4.95683	11.5831	11.0896	9.93577	19.146	26.5664	5.81189	23.8856	22.2887	8.55709	9.73149	11.0562	16.0157	9.34159	14.8007	26.7387
KLHL23	6.33173	5.41082	0.968343	4.47502	9.38066	10.8602	12.0148	7.78921	8.1924	8.58794	12.1284	9.7373	7.17433	10.4785	7.03779	7.14528	8.58773	6.70031	4.03515	5.01625	5.91362	15.816	15.2245	33.5805	12.4512	19.853	3.31861	24.2434	15.9319	5.70691	3.92123	2.03815	2.19474	2.71848	9.14944	4.7141	3.72474	5.82735	19.3139	1.52991	5.99046	9.45644	1.51616	1.73731	6.99799	1.34097	3.11642	9.31591	7.89457
KLHL24 (KRIP6)	23.2427	15.0483	11.3064	15.4165	15.0352	20.6693	22.0658	6.56772	6.88331	8.26032	19.8325	18.032	7.54166	8.79477	7.8994	8.80202	7.71649	7.09638	14.6953	8.80244	19.039	24.8929	23.6862	21.9492	12.8511	18.084	8.14822	17.8044	20.0027	13.7274	15.5134	6.04618	7.6127	6.86197	26.201	21.0139	24.1009	22.8008	27.7194	5.58358	17.2571	16.871	12.9549	14.0138	14.5566	13.4807	11.4129	8.07746	25.8198
KLHL25	6.25204	4.97271	2.1188	4.15059	3.77143	4.1201	4.70101	2.07556	2.85462	3.66157	2.66391	3.27502	3.96443	3.44888	1.8763	3.02067	4.34766	3.12316	1.67815	2.33178	5.47508	5.34953	5.33684	4.0749	3.36381	5.50839	5.11202	6.72913	6.51977	1.98446	1.23324	2.29593	2.87704	6.95119	4.89596	3.63673	2.47375	4.65759	3.91689	0.71724	4.37485	5.6885	7.2862	9.21989	3.36465	1.69884	3.81927	16.5329	3.33842
KLHL26	11.1522	9.00019	5.50983	16.2874	15.743	40.2389	9.2774	7.77958	10.4005	11.414	18.6232	20.0871	16.5278	14.3994	7.51088	7.41901	12.8328	9.41001	6.66258	5.47829	10.3085	8.53987	13.2286	9.32114	5.97455	12.1993	4.58278	11.0275	13.7663	5.52972	2.43625	3.42174	4.88763	2.25865	7.85609	5.85882	5.41735	18.5872	11.3944	2.92821	10.8418	9.72706	7.3257	9.02563	6.02213	6.15585	6.06278	9.2744	13.5568
KLHL28	4.65927	3.58296	2.90884	5.20467	5.3345	5.41952	4.94049	1.84754	2.31878	2.08709	6.97745	5.19942	2.0164	3.1074	2.04795	3.03909	2.22454	1.69434	4.28546	2.38915	4.20802	6.20564	6.42145	4.16368	3.47656	3.86931	4.68703	3.60491	6.06015	2.11152	1.46007	1.41885	2.21494	1.97636	4.86547	4.96593	2.96649	7.48663	6.14275	1.80666	5.29986	4.33646	5.03438	4.95031	4.23843	3.94049	2.80185	5.297	5.95382
KLHL29	12.3838	8.72997	10.875	7.98718	6.32654	14.5871	7.88696	2.44431	5.27296	3.74105	6.81142	8.03375	8.10047	7.8506	3.13084	5.65729	5.71791	2.83033	1.35688	1.79004	10.5482	9.38665	14.0333	15.8738	6.55511	13.4302	4.34619	17.168	12.2129	2.09663	0.76597	3.80049	6.13857	1.04834	7.53285	5.01522	6.63186	29.4904	5.66995	1.24389	19.7652	15.9498	9.62213	8.93317	5.75928	8.2195	2.02845	2.87737	3.64828
KLHL3	6.0672	3.60562	7.66672	6.09649	6.38854	3.56407	5.02626	3.42688	4.16247	5.75509	66.8027	65.9471	6.90144	6.75631	5.19306	4.49952	7.13612	4.79485	5.24552	4.43827	5.31635	8.6207	8.59892	3.37391	2.40396	4.18507	2.64826	3.64685	6.70246	10.8742	5.95265	4.89266	2.79885	1.14359	4.18006	2.31106	0.97431	15.2903	8.49882	1.15231	12.5745	4.35493	2.58713	2.51351	3.49743	5.0337	3.01389	12.6846	14.7446
KLHL30	6.03184	2.165	0.117236	21.5842	17.5237	22.9711	2.37874	0.0887906	0.0682602	0.0886492	0.620421	0.759558	0.120245	0.0664834	0.0905901	0.155221	0.0900199	0.0842294	0.138336	0.117896	2.31589	6.50725	4.57457	1.88722	1.2079	4.34369	0.629939	2.9665	3.05649	12.9461	10.4775	0.414192	1.14863	0.110563	1.7638	0.371251	109.976	2.30123	0.535428	0.0675482	0.169579	1.67632	0.61279	1.08196	1.18099	0.351115	0.518137	0.265892	1.32939
KLHL31	2.55089	4.41275	1.26724	0.0853246	0.33618	0.0587364	0.376096	0.139271	0.114155	0.338119	0.058969	0.070393	0.128861	0.119527	0.133562	0.19566	0.527393	0.225955	0.154022	0.151997	2.09115	0.141488	0.288302	0.123672	0.378503	0.125593	0.44041	0.124623	0.358676	31.9101	35.5456	0.196936	0.255178	0.329486	0.445419	1.10134	17.7604	0.301822	0.302894	0.286362	0.905202	1.35257	1.68194	1.99676	0.480408	0.256416	0.324086	0.727361	1.79099
KLHL32	0.084843	0.175376	0.163875	0.45727	0.291183	0.528036	0.117921	9.15739	7.58233	9.9226	11.7393	10.7306	7.97835	10.1406	12.3881	12.4743	8.36802	9.68245	25.2185	12.1441	0.190183	0.164795	0.294643	0.209607	0.39311	0.121434	0.0406674	0.0987404	0.484794	0.421494	0.156676	0.591388	0.704424	0.273569	0.412997	0.313029	0.168384	2.08331	1.30869	0.318204	2.22962	0.24871	0.0975977	0.104702	1.07044	0.350176	0.277021	2.60175	1.04844
KLHL33	0.862993	0.701581	0.239975	0.262437	0.592404	0.473034	0.941116	0.129985	0.115267	0.262786	1.82048	1.66246	0.13878	0.132783	0.115831	0.282107	0.182474	0.290679	0.183537	0.337314	0.97881	2.57811	2.73889	1.22758	0.539665	1.54035	0.217327	1.42636	1.38037	0.629065	0.444311	0.349921	0.494837	0.0923814	0.403421	0.474852	11.216	2.20828	1.47027	0.103883	0.334158	1.60583	0.142906	0.151461	0.654009	0.883279	0.23303	0.743409	0.812779
KLHL34	0.0455485	0.0176534	0.0168477	0.0697281	0.0650218	0.0201084	0.0663899	0.27693	0.543899	0.340697	2.28007	2.1207	0.628859	0.77031	0.277968	0.330645	0.57376	0.210023	0.109943	0.156277	0.0428705	0.0274057	0.0653238	0.118902	0.334819	0.245318	0.0152496	0.239713	0.0589739	0.516251	1.26935	0	0.0186891	0.0171291	0.033964	0.161488	8.52414	0.114476	0	0.0152156	0.120702	0.0333565	0.0538769	0.0751551	0.613374	0.225352	0.027161	0.193801	0.0290747
KLHL35	0.540443	0.534204	0.370344	2.4098	1.07332	0.530322	0.400056	1.53532	2.07976	3.69712	2.34376	2.46422	3.03767	3.31129	1.61152	3.18433	5.66052	2.79053	2.9037	1.15256	0.806636	0.51645	0.758682	0.305114	0.228251	0.254432	0.355638	0.244091	0.390566	0.378769	0.119726	0.163317	0.259096	0.034054	0.8331	0.651211	0.138355	2.21238	0.261582	0.588092	1.22618	0.411134	0.630778	0.778459	0.194126	1.35817	0.695714	10.3172	0.923152
KLHL36	15.9294	13.5991	9.9979	16.2983	14.4609	19.7489	18.3549	2.91298	3.81299	3.60641	9.37442	9.67559	4.52171	4.3935	3.37216	3.91753	4.02981	2.82168	4.12865	3.06566	14.7446	12.2153	13.9543	12.0868	10.8819	13.6327	13.152	13.1284	16.357	6.69601	5.93144	7.68957	7.38242	8.3779	17.5053	11.6225	3.68551	14.5787	19.2149	5.90044	12.2988	14.498	13.4427	13.417	14.7448	15.8293	11.5898	25.8325	21.525
KLHL38	0.32202	0.116927	0.039033	2.81309	2.98965	4.58209	0.613404	0.0843579	0.169973	0.049627	0	0	0.418338	0.407473	0.0540552	0.0423308	0.033937	0.0445309	0.0299443	0.0622198	0.314194	0.22618	0.333467	1.50616	0.492298	1.62344	0.131546	1.49307	0.518468	9.13921	13.2956	0.0283153	0.0444262	0.0236698	0.238264	0.17296	89.6363	0.283407	0.524411	0.0160137	0.033343	0.211184	0.229329	0.305076	0.251438	0.0511094	0.210958	0.221101	0.116642
KLHL4	0.677535	1.27653	31.0945	0.337366	0.409744	0.421192	0.532676	3.58313	2.63348	2.70334	0.638687	0.997383	2.72612	3.59757	4.46403	2.61462	2.57382	3.08815	13.5659	4.89384	0.384599	0.661182	1.08957	0.582283	0.281189	0.793044	0.114946	0.71278	4.43606	0.252392	0.185237	0.320326	0.327084	0.0569468	0.546492	0.0352626	0.0668663	0.349052	7.22464	0.0448712	0.105968	0.248258	0.119634	0.151169	0.337124	0.844657	0.204121	6.28852	1.08857
KLHL40 (KBTBD5)	0.146565	0.0773919	0.0220599	0.141583	0.119333	0.215101	0.0606431	0.090332	0.0780191	0.134478	0.0823208	0.0812749	0.104113	0.079476	0.114165	0.0851406	0.105056	0.124508	0.177566	0.124098	0.0897947	0.129133	0.273807	0.120481	0.0654401	0.115659	0.0379159	0.086476	0.0504798	0.964259	0.450353	0	0.0102851	0.0134528	0.0773765	0.365136	302.876	0.285336	0.0416453	0.0156021	0.0346614	0.081332	0.103065	0.136764	0.064511	0.0177964	0.0595607	4.55096	0.0560641
KLHL41 (KBTBD10)	1.3678	1.12335	0.78058	1.92821	1.99578	1.72738	5.43447	1.27387	1.4002	1.95788	5.87884	5.08839	1.7578	1.6145	1.42518	2.44984	2.27446	1.67062	1.23812	1.25597	1.5345	2.01334	2.53117	2.26359	1.11565	4.98631	0.711865	2.60247	2.0349	47.6938	56.7513	0.611795	1.21037	0.415106	3.12344	6.1085	3420.26	3.1163	2.33681	0.625339	10.5962	3.74771	1.27694	1.37204	1.09399	1.23889	1.05186	10.3175	3.61453
KLHL42 (KLHDC5)	13.3049	10.7256	9.77467	57.9678	28.9859	36.4183	30.6137	10.179	12.8593	11.5019	28.6012	23.5266	14.1645	20.6804	10.187	13.7475	13.8695	9.88301	17.1582	11.094	13.8386	27.5428	25.613	42.8831	19.0627	44.8232	9.18706	47.3848	30.9834	5.33772	2.7535	6.48807	8.118	3.90303	18.3494	8.10732	1.62542	27.4035	15.9864	11.3415	20.1857	22.8536	9.97135	10.5612	14.1455	10.666	10.0515	16.3825	15.907
KLHL5	22.3097	18.3253	12.2466	12.5106	12.9869	13.0516	18.8179	20.3981	14.0105	15.8952	11.0512	13.0045	12.4693	14.7627	19.9157	21.1696	13.0057	16.7504	34.9754	24.4975	17.2191	14.0765	14.6637	43.299	13.4226	19.2118	6.66678	31.2924	13.753	4.52727	2.87621	7.71279	8.40065	8.86639	21.0427	8.51456	2.97774	19.0912	14.2151	2.39487	8.06921	18.4685	3.99455	4.71448	9.15323	8.14875	5.83492	6.45864	11.8602
KLHL6	1.89897	2.1838	0.766511	1.24021	1.49895	0.496703	1.65822	0.272873	0.153571	0.256765	0.106929	0.112025	0.139205	0.142209	0.313658	0.528603	0.21241	0.158528	1.80058	0.61001	1.53744	0.644764	1.12038	0.722678	2.99091	0.737597	0.748337	0.813213	2.09624	0.931693	0.438139	0.422752	0.478926	0.395736	11.4433	3.10115	0.170133	1.53524	0.329325	0.200555	0.613738	1.06804	0.38432	0.401745	8.59048	15.7782	1.20633	0.444006	1.16595
KLHL7	9.21909	7.65512	13.1685	10.4228	10.5224	11.7266	9.33094	6.90328	8.44585	7.70411	19.6529	14.6541	7.75373	11.9967	6.61245	9.83685	8.83215	5.77463	8.55743	7.54055	8.5023	13.0299	13.6019	9.70616	5.6173	8.76757	6.16302	9.53205	11.967	13.7695	16.2342	2.96647	4.15072	1.87987	7.05844	7.93632	4.71176	11.9694	13.1674	2.49348	6.90524	7.45977	8.73197	9.53523	5.62896	5.78339	3.81344	28.8937	8.02388
KLHL8	5.58752	5.59451	3.93497	4.6576	5.02389	5.18156	5.21771	2.37595	2.69638	2.85467	6.54669	4.13971	2.67593	4.27803	2.39815	3.11626	2.69179	1.92819	3.83015	2.33232	4.7806	10.3569	9.43958	4.82667	4.57407	3.64991	3.29371	3.71133	5.31133	2.32547	1.67618	3.12286	3.81214	2.92764	5.72347	4.46424	7.67084	5.58957	4.9362	1.83786	5.64616	4.69405	3.58833	3.58532	3.75116	4.34121	2.88106	4.40017	11.0867
KLHL9	17.3427	15.1619	11.7454	17.6173	18.0658	16.4263	15.8808	6.59027	7.95068	6.68908	19.9222	15.8917	7.34275	10.7588	6.48995	10.3491	6.75891	5.56888	11.9222	7.51256	17.0344	19.2564	22.5252	15.0896	13.4802	13.462	11.7355	13.6513	18.8139	5.86037	4.60938	6.78344	11.2959	5.75646	15.5093	15.6326	3.62826	21.7974	21.4929	6.31673	11.5401	16.3879	10.4078	11.0052	13.7206	15.5797	11.5481	10.4207	18.2619
aThe RNA-seq data for tissues are from the GTEx database (https://www.gtexportal.org/home/) and give the median TPM from usually hundreds of samples for each tissue; the cell culture data is from ENCODE at the UCSC Genome Browser (long poly(A)+ RNA
[truncated: 15 more columns]
