# Supplementary material for: Epigenetics of Muscle- and Brain-Specific Expression of KLHL Family Genes
Source: Int J Mol Sci. 2020 Nov 9;21(21):8394. doi: 10.3390/ijms21218394 (PMC7672584; doi:10.3390/ijms21218394)
Supplement: Supplementary file 1 [file ijms-21-08394-s001.zip › Ehrlich_KLHL_Epigen_ Table-Suppl_Table3-Final_10_30_20.xlsx]

## Sheet: TableS3-retrogenes
Table S3. KLHL family genes containing retrotransposed genes (retrogenes) in coding exons derived from other KLHL family genes
Host gene												Retrogene parent gene
Name	Tissues with highest expression	Exons in the host gene (and encoded KLHL domains) that overlap the retrogene b	Retrogene	Protein alignment: Percent identity of parent gene to retrogene	Chromatin type at the retrogene	CGI overlapping exons in host gene that are derived from the retrogene?c	Position wrt TSS	Position in gene	Clade for the host gene (retrogene parent) (based on CDD protein alignment d)	Coordinates for retrogene within the host gene (hg19)		Name	Tissues with highest expression (from GTEx; see Table S2)	Exons in the retrogene parent that inserted into the host gene	CGI overlapping exons in the parent gene that gave rise to the retrogenec
KLHL family genes containing expressed shuffle KLHL retrogenese
KLHL17	testis,cerebellum, cervix	2, 3, 4 (2 BTB_POZ & Back); 7, 8 (1 Kelch repeat) 12 exons total in gene	retro-KEAP1	41	some promoter but mostly txn chromatin in all tissues	yes	(+495)	5'-end	clade 3 (3)	chr1:896680-897420		KEAP1	broad expression but highest in SkM	Exon 2, 3	yes (exons 1 & 3 only)
KLHL20	artery, uterus, testis	2 (BTB_POZ & Back) 12 exons total in gene	retro-KLHL2	14	enhancer SkM & heart	no	(+19091)	gene body	clade 3 (3)	chr1:173702986-173703442		KLHL2	brain	1, 3, 4, 5	no
KLHL21	SkM, artery	1 (Back & BTB_POZ) 4 exons total in gene	retro-KLHL17	35	promoter in all tissues	yes (constitutively unmethylated)	(+349)	5'-end	clade 4 (3)	chr1:6662085-6662856		KLHL17	testis, cerebellum, cervix	2 - 6	yes
KLHL26	artery	3 (BTB_POZ, Back, 5 Kelch repeats) 4 exons total in gene	retro-KEAP1	71	txn chromatin	yes	(+31448)	3'-end	clades 2 (3)	chr19:18778464-18779987		KEAP1	broad expression but highest in SkM	2, 3	yes (exon 3)
KLHL31	Heart, SkM	3 (4 Kelch repeats) 3 exons total in gene	retro-KLHL36	29	promoter in all tissues	yes (constitutively unmethylated)	(+13699),	3'-end	clade 2 (2)	chr6:53516470-53517146		KLHL36	testis, thyroid, artery	3, 4	yes
KLHL38	SkM, Heart	2 (2 kelch repeats, Back & BTB_POZ domain) 4 exons total in gene	retro-KLHL30	80	promoter in SkM & heart; enhancer in aorta & brain	no	(+668)	5'-end	clade 4 (4)	chr8:124663817-124665160		KLHL30	SkM	2	yes
KLHL family genes containing KLHL-family retrogenes but not of the expressed shuffle type
KLHL9 f	uteris, cervix, ovary, cerebellum	1: (5 kelch, repeats, BTB_POZ) only 1 exon in gene	retro-KLHL13	72	promoter in all tissues	no	(+1876),	gene body	clade 2 (2)	chr9:21332020-21334990		KLHL13	Uterus, cervix	4 - 6	no
KLHL25g	testis	2 (5 Kelch repeats, Back & BTB_POZ) 3 exons total in gene	retro-KLHL17	44	txn chromatin	yes	(+26026)	gene body	clades 4 (3)	chr15:86311267-86313044		KLHL17	testis, cerebellum, cervix	2 - 12	yes
KBTBD11g	brain	2 (BTB_POZ, Bach, 2 Kelch repeats) 2 exons total in gene	retro-KLHL17	43	promoter in all tissues	yes (constitutively unmethylated)	(+28008)	3'-end	clade 3 (3)	chr8:1,949,415-1,950,685		KLHL17	testis, cerebellum, cervix	2 - 12	yes
aKLHL family (KLHL or KBTBD genes) genes that are host genes containing retrotransposed genes (retrogenes) derived from other KLHL family genes (retrogene parent gene) as downloaded from the UCSC Genome Browser (hearttp://genome.ucsc.edu, Retroposed Genes V5); this includes genes that did not show preferential expression in skeletal muscle or brain
bExons in the host KLHL/KBTBD gene containing sequences from a KLHL retrogene and the encoded protein domains as determined by search of the Conserverved Domain Database (hearttps://www.ncbi.nlm.nih.gov/Structure/cdd/wrpsb.cgi)
cCGI, CpG islands from the UCSC Genome Browser (hearttp://genome.uscsc.edu; note that the retrogene-containing exons in KLHL38 are rich in CpGs although they did not quite meet the criteria to be classified as a CGI
dPhylogenetic tree (see Figure S7) was developed using the NCBI Conserved Domain Database (hearttps://www.ncbi.nlm.nih.gov/cdd/)
eExpressed shuffle retrogene, a retrogene that is expressed in a pre-existing host gene and contributes part of its open reading frame (ORF) to the host gene’s ORF
fThis retrogene provides all, not just part, of the host gene's open reading frame (ORF)
gThis retrogene is expressed in the host gene but has not retained any of its original ORF
