# Supplementary material for: Epigenetics of Muscle- and Brain-Specific Expression of KLHL Family Genes
Source: Int J Mol Sci. 2020 Nov 9;21(21):8394. doi: 10.3390/ijms21218394 (PMC7672584; doi:10.3390/ijms21218394)
Supplement: Supplementary file 1 [file ijms-21-08394-s001.zip › Ehrlich_KLHL_Epigen_ Table-Suppl_Table4-Final_10_30_20.xlsx]

## Sheet: Table S4-AllExprShufRetrogenes
Table S4. Retrotransposed genes whose open reading frame contributes to the host gene's open reading frame (expressed shuffle retrogenes): Six KLHL genes are among the 740 human genes containing expressed shuffle retrogenesa
Host gene containing an expressed shuffle retrogene							Parent gene for retrogene			Retrogene
RefSeq name	Genbank Accession Number (for only one of the gene isoforms if >1)	Chrom	Transcription start	Transcription end	Strand		RefSeq name	Genbank Accession Number		Genbank Accession Number or Expressed Sequence Tag	Chrom	Transcription start	Transcription end	Size of the retrogene (bp)	Strand for the retrogene	Percent coverage for bases matching the parent gene
AATK	NM_001080395.3	chr17	79091094	79140021	-		VEGFB	NM_003377		NM_001243733.1-3	chr17	79139256	79140070	814	-	40
ABCA9	NM_080283.4	chr17	66970628	67057068	-		ABCE1	NM_002940		AK315198.1-57	chr17	66983972	66985270	1298	-	40
ABHD2	NM_007011.8	chr15	89631686	89745586	+		TBL1Y	NM_033284		AK298210.1-67	chr15	89735970	89736675	705	-	19
ACCSL	NM_001363113.1	chr11	44069530	44081527	+		n/a	NR_024569		CR627052.1-154	chr11	44080492	44081504	1012	-	45
ACHE	NM_001367919.2	chr7	100487614	100494614	-		CEL	NM_001807		NM_001807.4-9	chr7	100490836	100491794	958	-	34
ACTA1	NM_001100.4	chr1	229566991	229569841	-		ACTR1A	NM_005736		AB462953.1-7	chr1	229567248	229568850	1602	-	88
ACTB	NM_001101.5	chr7	5566778	5570232	-		ACTR1A	NM_005736		CU674342.1-45	chr7	5567922	5569284	1362	-	57
ACTG1	NM_001199954.2	chr17	79476996	79479825	-		ACTL6B	NM_016188		NM_016188.4-22	chr17	79477751	79479377	1626	-	70
ACTRT3	NM_032487.5	chr3	169484708	169487349	-		ACTA2	NM_001613		NM_001613.2-47	chr3	169485214	169486137	923	-	64
ADAM10	NM_001320570.2	chr15	58881007	59041906	-		HSP90AB1	NM_001271969		NM_001271969.1-10	chr15	58982663	58985491	2828	-	92
ADAMTS10	NM_030957.4	chr19	8645123	8675600	-		KIAA1879	NM_052892		AB067466.1-21	chr19	8669385	8670741	1356	-	16
ADARB1	NM_015833.4	chr21	46494494	46646475	+		ILF3	NM_001137673		AB209062.1-453	chr21	46595814	46596496	682	+	12
ADARB2	NM_018702.4	chr10	1223252	1779719	-		ILF3	NM_001137673		NM_001137673.1-1	chr10	1405226	1406006	780	-	18
ADCY9	NM_001116.4	chr16	4012653	4166443	-		ADCY4	NM_001198568		NM_001198568.1-4	chr16	4163838	4164340	502	-	13
ADGRV1	NM_032119.4	chr5	89854613	90460254	+		MTIF2	NM_001005369		NM_001005369.1-12	chr5	90000654	90001291	637	+	17
ADRA1B	NM_000679.4	chr5	159343488	159400019	+		DRD2	NM_000795		AB385097.1-37	chr5	159344065	159344850	785	+	56
ADRA1D	NM_000678.4	chr20	4201276	4229934	-		DRD3	NM_000796		NM_000796.3-21	chr20	4228502	4229227	725	-	31
ADRB3	NM_000025.3	chr8	37820507	37824117	-		DRD4	NM_000797		NM_000797.3-61	chr8	37822857	37823902	1045	-	71
AGAP11	NM_133447.2	chr10	88730092	88769960	+		AGAP1	NM_001037131		NM_001037131.2-13	chr10	88768009	88771308	3299	+	21
AGAP3	NM_001350104.2	chr7	150782953	150841521	+		SRRM3	NM_001110199		NM_001110199.1-11	chr7	150783354	150784032	678	+	16
AGAP4	NM_001276343.2	chr10	46321039	46342921	-		AGAP1	NM_001037131		NM_001037131.2-3	chr10	46319720	46322941	3221	-	20
AGAP5	NM_001144000.1	chr10	75434032	75457554	-		AGAP1	NM_001037131		NM_001037131.2-12	chr10	75432699	75435935	3236	-	20
AGAP6	NM_001365867.1	chr10	51748077	51770276	+		AGAP1	NM_001037131		NM_001037131.2-11	chr10	51768367	51771584	3217	+	20
AGAP9	NM_001190810.1	chr10	48215723	48237508	+		AGAP1	NM_001037131		NM_001037131.2-6	chr10	48235715	48238932	3217	+	20
AKAP13	NM_001270546.1	chr15	86163180	86292589	+		MYH9	NM_002473		BC113067.1-3	chr15	86284379	86284710	331	-	22
AKAP17A	NM_005088.3	chrX	1710496	1721413	+		CROCC	NM_014675		NM_014675.3-38	chrX	1719550	1720441	891	+	10
AKT1	NM_005163.2	chr14	105235685	105259938	-		RPS6KB2	NM_003952		AB208827.1-467	chr14	105239200	105239943	743	-	10
AKT2	NM_001243028.3	chr19	40736223	40791252	-		RPS6KB2	NM_003952		AB208827.1-854	chr19	40741708	40742294	586	-	8
ALDH2	NM_001204889.2	chr12	112204736	112255336	+		ALDH1L1	NM_012190		BC045645.1-196	chr12	112220406	112221101	695	+	13
AMACR	NM_014324.6	chr5	33986269	34008155	-		FH	NM_000143		NM_000143.3-4	chr5	33997098	33997781	683	-	36
AMZ1	NM_001321766.1	chr7	2727835	2804759	+		GNAS	NM_080425		NM_016592.2-16	chr7	2770801	2771333	532	-	20
ANKK1	NM_178510.2	chr11	113258500	113271138	+		ANKDD1A	NM_182703		BC110610.1-1	chr11	113269795	113270211	416	+	50
ANKRD16	NM_019046.3	chr10	5903578	5931856	-		RPL12	NM_000976		NM_000976.3-4	chr10	5903724	5904634	910	-	87
ANKRD24	NM_133475.1	chr19	4183350	4224811	+		CROCC	NM_014675		DQ139275.1-139	chr19	4215475	4218232	2757	+	38
ANKRD30B	NM_001367607.1	chr18	14748170	14854258	+		KIAA1641	NM_001164315		AB046861.1-55	chr18	14793059	14796404	3345	+	29
ANKRD35	NM_001280799.1	chr1	145549208	145568526	+		CGN	NM_020770		NM_020770.2-1	chr1	145561158	145562975	1817	+	26
ANKRD65	NM_001145210.2	chr1	1353799	1356824	-		MIB2	NM_080875		AK309362.1-1	chr1	1355183	1356074	891	-	31
ANKS6	NM_173551.5	chr9	101494290	101558837	-		MIB2	NM_080875		NR_033183.1-12	chr9	101558324	101558718	394	-	11
AP1G2	NM_001354681.2	chr14	24028775	24037000	-		LLGL1	NM_004140		NM_004140.3-204	chr14	24031820	24032965	1145	-	18
ARFGEF3	NM_020340.5	chr6	138483075	138665800	+		TTLL3	NR_037162		NR_037162.1-176	chr6	138654758	138655756	998	+	18
ARHGEF18	NM_015318.4	chr19	7460030	7537364	+		AKR1B10	NM_020299		NM_020299.4-145	chr19	7527094	7528010	916	-	39
ARL4C	NM_005737.3	chr2	235401684	235405693	-		ARF5	NM_001662		NM_001662.3-18	chr2	235404696	235405374	678	-	58
ARPIN-AP3S2	NM_001199058.2	chr15	90373830	90456184	-		AP4S1	NM_001254727		NM_007077.4-172	chr15	90430590	90431848	1258	-	45
ARSI	NM_001012301.4	chr5	149675905	149682468	-		ARSB	NM_198709		AK314903.1-6	chr5	149676916	149682017	5101	-	91
ARSJ	NM_024590.4	chr4	114821439	114900803	-		ARSB	NM_198709		AK314903.1-2	chr4	114823567	114824830	1263	-	72
ARX	NM_139058.3	chrX	25021810	25034082	-		VSX1	NR_045948		NR_045951.1-63	chrX	25030966	25031352	386	-	17
ASIC2	NM_001094.4	chr17	31340104	32483825	-		ASIC1	NM_020039		NR_046389.1-5	chr17	31618431	31619355	924	-	19
ASMT	NM_004043.2	chrX	1714347	1761974	+		CROCC	NM_014675		NM_014675.3-38	chrX	1719550	1720441	891	+	10
ATCAY	NM_033064.5	chr19	3880682	3928080	+		CSNK1G2	NM_001319		AF001177.1-345	chr19	3909025	3909608	583	+	19
ATP10A	NM_024490.3	chr15	25923858	26108349	-		ATP8B2	NM_001005855		NM_001005855.1-4	chr15	26107816	26108287	471	-	28
ATP2A1	NM_173201.4	chr16	28889808	28915832	+		HDGFRP2	NM_001001520		AB208892.1-386	chr16	28892874	28894070	1196	-	29
ATP2A2	NM_001681.4	chr12	110719051	110788898	+		ATP2C1	NM_001199179		AK304374.1-4	chr12	110765374	110765815	441	+	12
AZU1	NM_001700.5	chr19	827836	832018	+		RNF135	NM_001184992		BC082262.1-188	chr19	830678	831205	527	+	20
B4GALNT4	NM_178537.5	chr11	369498	382117	+		ILVBL	NM_006844		CU680024.1-1	chr11	376436	376921	485	-	36
BARHL1	NM_020064.4	chr9	135457992	135465639	+		TLX1	NM_001195517		NM_005521.3-63	chr9	135462344	135463008	664	+	27
BCAS4	NM_001010974.2	chr20	49411430	49493714	+		TMSB4X	NM_021109		NM_021109.3-13	chr20	49456750	49457364	614	-	93
BEST2	NM_017682.3	chr19	12862604	12869272	+		BAD	NM_004322		AK309150.1-227	chr19	12867991	12868871	880	-	64
BICDL2	NM_001103175.2	chr16	3077682	3085542	-		FLJ00354	NM_032251		AK090436.1-9	chr16	3080364	3081122	758	-	13
BMP2	NM_001200.4	chr20	6748332	6760893	+		BMP5	NM_021073		NM_021073.2-7	chr20	6759429	6759809	380	+	17
BMP4	NM_001347917.1	chr14	54416453	54421768	-		BMP7	NM_001719		NM_001719.2-141	chr14	54416751	54417115	364	-	8
BOP1	NM_015201.5	chr8	145316947	145331185	-		TCF15	NM_004609		NM_004609.3-28	chr8	145321507	145322306	799	+	59
BPIFB1	NM_033197.3	chr20	31871019	31897677	+		UBE2I	NM_194261		AK024172.1-716	chr20	31884755	31885923	1168	-	22
BRCA1	NM_007299.4	chr17	41196311	41277381	-		RPL21P28	NM_000982		NR_026911.1-79	chr17	41231275	41231833	558	+	98
BRD1	NM_001304809.1	chr22	50166925	50219548	-		MLLT6	NM_005937		NM_005937.3-12	chr22	50216870	50217317	447	-	5
BRF1	NM_001519.4	chr14	105675622	105767338	-		BTBD2	NM_017797		BC069199.1-2	chr14	105716023	105717017	994	+	46
BRPF1	NM_004634.2	chr3	9773433	9789699	+		MLLT6	NM_005937		NM_005937.3-13	chr3	9780963	9781506	543	+	6
BRPF3	NM_015695.3	chr6	36164520	36200567	+		MLLT6	NM_005937		NM_005937.3-16	chr6	36168740	36169482	742	+	8
BTBD17	NM_001080466.2	chr17	72352554	72358007	-		CELF6	NM_052840		AK308073.1-9	chr17	72353362	72353871	509	-	23
BTBD6	NM_033271.3	chr14	105714869	105717430	+		BTBD2	NM_017797		BC069199.1-2	chr14	105716023	105717017	994	+	46
BTN1A1	NM_001732.3	chr6	26500530	26510653	+		MEFV	NM_000243		NM_000243.2-1159	chr6	26508617	26509260	643	+	18
C1QL3	NM_001010908.2	chr10	16555732	16563878	-		MFRP	NM_015645		NM_031433.2-6	chr10	16562492	16563136	644	-	13
C1QTNF9	NM_178540.5	chr13	24883717	24896669	+		COL25A1	NM_198721		NR_045756.2-5	chr13	24895131	24895492	361	+	7
C1R	NM_001354346.2	chr12	7187522	7244489	-		F2	NM_000506		AY344794.1-3	chr12	7187848	7188558	710	-	85
C1RL	NM_001297640.2	chr12	7247149	7261810	-		CELA2A	NM_033440		E01220.1-9	chr12	7248984	7249701	717	-	69
C2orf81	NM_001316765.2	chr2	74641303	74648746	-		HMGA1	NM_145901		NM_002131.3-7	chr2	74643944	74645818	1874	-	90
CALM1	NM_006888.6	chr14	90863372	90874612	+		EFCAB2	NR_026586		NR_026587.1-298	chr14	90867657	90868299	642	+	14
CALR	NM_004343.3	chr19	13049413	13055304	+		CANX	NM_001746		NM_001024649.1-1	chr19	13051058	13051621	563	+	9
CARD9	NM_052813.5	chr9	139258407	139268121	-		CARD14	NR_047566		NR_047566.1-8	chr9	139264672	139266459	1787	-	24
CATIP	NM_198559.2	chr2	219221579	219232817	+		FP15621	NM_001039966		AF495721.1-310	chr2	219229355	219230151	796	-	32
CCDC146	NM_020879.3	chr7	76751931	76924521	+		ANGPT2	NM_001147		NM_001118887.1-425	chr7	76825726	76826246	520	-	8
CCDC157	NM_001318334.2	chr22	30752612	30774662	+		FLJ00354	NM_032251		AK090436.1-17	chr22	30769906	30770255	349	+	6
CCDC32	NM_001289132.1	chr15	40823539	40857256	-		n/a	NR_038161		AF135160.1-3	chr15	40824077	40824736	659	-	84
CCDC85A	NM_001348512.1	chr2	56411257	56613309	+		SNAP91	NM_001256717		BC036650.1-4	chr2	56420212	56420538	326	-	7
CCDC85C	NM_001144995.2	chr14	99966526	100070544	-		RASGRP2	NM_153819		AK092882.1-3	chr14	100069852	100070650	798	-	24
CCDC88B	NM_032251.6	chr11	64107675	64125006	+		FLJ00313	NR_026752		AK090414.1-110	chr11	64120218	64120742	524	+	8
CCDC88C	NM_001080414.4	chr14	91737666	91884164	-		CDC42BPG	NM_017525		NM_017525.2-7	chr14	91779661	91780496	835	-	15
CCR10	NM_016602.3	chr17	40830906	40833861	-		KISS1R	NM_032551		NM_032551.4-12	chr17	40831524	40832501	977	-	54
CCR7	NM_001301717.1	chr17	38710020	38717265	-		OPRL1	NM_001200019		CR542061.1-21	chr17	38711109	38711949	840	-	68
CD70	NM_001330332.2	chr19	6581658	6591161	-		FBXL18	NM_024963		AK021529.1-66	chr19	6590677	6591659	982	+	61
CD93	NM_012072.4	chr20	23059996	23066961	-		LTBP4	NM_003573		AK128191.1-20	chr20	23065428	23065989	561	-	16
CDC42BPG	NM_017525.3	chr11	64590523	64612125	-		CCDC88B	NM_032251		NM_032251.5-5	chr11	64601728	64603067	1339	-	22
CDH11	NM_001330576.2	chr16	64977655	65155966	-		CDH3	NM_001793		NM_001793.4-113	chr16	64981535	64982029	494	-	11
CDH7	NM_033646.3	chr18	63417487	63552372	+		CDH2	NM_001792		NM_001792.3-8	chr18	63547659	63548102	443	+	9
CDK4	NM_000075.4	chr12	58141509	58146093	-		RSKR	NM_001174103		NM_001174103.1-298	chr12	58143486	58144846	1360	-	26
CDY1	NM_170723.1	chrY	27768263	27770485	+		CDYL	NM_004824		NM_004824.3-50	chrY	27768355	27771127	2772	+	79
CDY1B	NM_001003894.1	chrY	26191939	26194161	-		CDYL	NM_004824		NM_004824.3-42	chrY	26191297	26194069	2772	-	79
CELF4	NM_001353696.2	chr18	34823002	35145761	-		CELF5	NM_001172673		NM_021938.3-9	chr18	35145137	35145536	399	-	18
CELSR1	NM_014246.3	chr22	46756730	46933517	-		CDH23	NM_022124		NM_022124.5-8	chr22	46929548	46932139	2591	-	20
CELSR2	NM_001408.3	chr1	109792160	109818373	+		DCHS1	NM_003737		NM_003737.2-1	chr1	109793269	109795577	2308	+	17
CEP135	NM_025009.5	chr4	56815110	56899527	+		TSGA10	NM_025244		AK308951.1-340	chr4	56877896	56884475	6579	+	53
CEP250	NM_001318219.1	chr20	34047802	34099804	+		CCDC88C	NM_001080414		NM_001080414.3-9	chr20	34090968	34092560	1592	+	18
CHADL	NM_138481.2	chr22	41625516	41636935	-		ADGRA2	NM_032777		NM_032777.9-9	chr22	41633560	41634464	904	-	12
CHRNA10	NM_001303034.1	chr11	3686816	3692614	-		CHRNB4	NM_000750		NM_001256567.1-69	chr11	3689461	3690596	1135	-	46
CHRNA3	NM_000743.5	chr15	78887650	78913338	-		CHRND	NM_000751		NM_000751.2-7	chr15	78893903	78894545	642	-	20
CHRNA4	NM_001256573.2	chr20	61974574	61992701	-		CHRNA7	NM_001190455		NM_000746.5-68	chr20	61981666	61982419	753	-	21
CHRNA5	NM_001307945.2	chr15	78857861	78887611	+		CHRNB1	NM_000747		NM_000747.2-435	chr15	78882194	78883724	1530	+	49
CHRNA6	NM_004198.3	chr8	42607762	42623929	-		CHRNA7	NM_001190455		NM_000746.5-99	chr8	42611214	42612177	963	-	25
CHRNA9	NM_017581.4	chr4	40337349	40357234	+		CHRNA7-2	NR_046324		EF405818.1-11	chr4	40350975	40351437	462	+	88
CIAO1	NM_004804.3	chr2	96931962	96939911	+		CATSPERD	NM_152784		AK128088.1-1144	chr2	96936314	96937073	759	-	15
CLEC17A	NM_207390.3	chr19	14693895	14721956	+		PPARGC1B	NM_133263		AY188950.1-337	chr19	14703099	14704481	1382	+	22
CLIP2	NM_032421.3	chr7	73703736	73820265	+		TH1	NM_198976		AJ238376.1-253	chr7	73814202	73814854	652	+	23
CLSTN1	NM_014944.4	chr1	9789078	9884584	-		ESPNP	NR_026567		NR_026567.1-3	chr1	9883519	9884043	524	+	23
CMKLR1	NM_001142345.1	chr12	108681820	108714439	-		OPRD1	NM_000911		NM_000911.3-17	chr12	108685767	108686607	840	-	41
CNDP2	NM_001370254.1	chr18	72163597	72190689	+		DKFZp547O175	NM_001243014		AL833963.1-531	chr18	72177779	72178964	1185	+	44
CNGA1	NM_000087.4	chr4	47937996	48014962	-		CNGA4	NM_001037329		BC106935.2-5	chr4	47938559	47939848	1289	+	68
CNGB3	NM_019098.4	chr8	87586162	87755903	-		PBLD	NM_022129		NM_022129.3-965	chr8	87682244	87683419	1175	-	27
COG8	NM_032382.4	chr16	69362523	69373526	-		CCDC88B	NM_032251		BC151218.1-12	chr16	69363837	69364267	430	+	8
COL10A1	NM_000493.4	chr6	116440071	116447295	-		COL11A1	NM_080629		NM_001190709.1-28	chr6	116441712	116443101	1389	-	17
COL11A2	NM_080681.3	chr6_cox_hap2	4574307	4604080	-		DKFZp434L081	NM_001844		AL834148.1-66	chr6_cox_hap2	4583084	4584253	1169	-	10
COL1A1	NM_000088.3	chr17	48261456	48279000	-		COL1A2	NM_000089		Z74616.1-18	chr17	48265986	48268276	2290	-	34
COL22A1	NM_152888.3	chr8	139600477	139926284	-		COL6A1	NM_001848		AK298968.1-8	chr8	139890116	139890698	582	-	27
COL2A1	NM_001844.5	chr12	48366749	48398259	-		COL1A2	NM_000089		Y00724.1-11	chr12	48370291	48372562	2271	-	66
COL4A1	NM_001845.6	chr13	110801309	110959504	-		COL21A1	NM_030820		AK126586.1-4	chr13	110828761	110829391	630	-	16
COL4A2	NM_001846.4	chr13	110959630	111165556	+		COL24A1	NM_152890		BC116180.2-10	chr13	111155791	111157122	1331	+	15
COL5A1	NM_000093.5	chr9	137533648	137736689	+		COL27A1	NM_032888		BC007696.2-528	chr9	137694727	137695493	766	+	21
COL5A3	NM_015719.4	chr19	10070236	10121180	-		CABC1	NM_020247		BC129930.1-204	chr19	10089589	10090504	915	-	30
COL6A3	NM_057165.5	chr2	238280259	238322807	-		COL20A1	NM_020882		BC041767.1-6	chr2	238289581	238290122	541	-	10
COL7A1	NM_000094.3	chr3	48601505	48632593	-		COL16A1	NM_001856		BC118655.1-18	chr3	48608274	48608713	439	+	28
COL8A1	NM_020351.4	chr3	99357437	99518061	+		COL22A1	NM_152888		NM_152888.1-25	chr3	99513123	99514426	1303	+	19
COL8A2	NM_005202.4	chr1	36560839	36590823	-		COL22A1	NM_152888		NM_152888.1-2	chr1	36563603	36565052	1449	-	21
COLEC12	NM_130386.3	chr18	316736	500701	-		COL25A1	NM_198721		NR_045756.2-9	chr18	334795	335195	400	-	7
COMP	NM_000095.3	chr19	18893582	18902114	-		HSD3B7	NM_001142777		NM_025193.3-401	chr19	18893652	18894722	1070	+	43
CPT2	NM_001330589.2	chr1	53662495	53679869	+		CRAT	NM_001257363		AK313931.1-1	chr1	53676346	53676901	555	+	23
CRACD	NM_020722.1	chr4	57036360	57196890	+		SART1	NM_005146		AK223016.1-7	chr4	57180336	57181274	938	+	34
CRK	NM_005206.5	chr17	1323986	1359526	-		TAPBP	NM_003190		NM_172209.2-747	chr17	1358988	1360866	1878	+	44
CRTC3	NM_001042574.3	chr15	91073154	91188577	+		DACT3	NM_145056		NM_145056.2-5	chr15	91072672	91073673	1001	+	33
CSMD3	NM_198124.2	chr8	113235156	114389381	-		RPL18	NM_000979		NM_000979.3-19	chr8	114388855	114389519	664	+	69
CSNK1E	NM_001894.4	chr22	38686696	38714089	-		PHKG1	NM_001258459		NM_001258459.1-444	chr22	38695545	38696927	1382	-	52
CT47A1	NM_001080146.1	chrX	120116319	120119638	-		NAP1L1	NM_139207		BT007023.1-38	chrX	120117611	120118526	915	-	75
CT47A10	NM_001080137.1	chrX	120072554	120075873	-		NAP1L1	NM_004537		NM_139207.2-30	chrX	120073806	120074761	955	-	20
CT47A11	NM_173571.2	chrX	120067693	120071012	-		NAP1L1	NM_004537		NM_139207.2-29	chrX	120068945	120069900	955	-	20
CT47A12	NM_001242922.1	chrX	120011343	120066151	-		NAP1L1	NM_004537		NM_004537.4-27	chrX	120012064	120013225	1161	-	21
CT47A2	NM_001080145.1	chrX	120111459	120114778	-		NAP1L1	NM_004537		NM_139207.2-38	chrX	120112711	120113666	955	-	20
CT47A3	NM_001080144.1	chrX	120106599	120109918	-		NAP1L1	NM_004537		NM_139207.2-37	chrX	120107851	120108806	955	-	20
CT47A4	NM_001080143.1	chrX	120101739	120105058	-		NAP1L1	NM_004537		NM_139207.2-36	chrX	120102991	120103946	955	-	20
CT47A5	NM_001080142.1	chrX	120096879	120100198	-		NAP1L1	NM_004537		NM_139207.2-35	chrX	120098131	120099086	955	-	20
CT47A6	NM_001080141.1	chrX	120092018	120095337	-		NAP1L1	NM_139207		BT007023.1-33	chrX	120093310	120094225	915	-	75
CT47A7	NM_001080140.1	chrX	120087135	120090454	-		NAP1L1	NM_004537		NM_139207.2-33	chrX	120088387	120089342	955	-	20
CT47A8	NM_001080139.1	chrX	120082275	120085594	-		NAP1L1	NM_004537		NM_139207.2-32	chrX	120083527	120084482	955	-	20
CT47A9	NM_001080138.1	chrX	120077414	120080733	-		NAP1L1	NM_004537		NM_139207.2-31	chrX	120078666	120079621	955	-	20
CT47B1	NM_001145718.1	chrX	120006450	120009779	-		NAP1L1	NM_139207		BT007023.1-25	chrX	120007731	120008637	906	-	75
CTSL	NM_001912.5	chr9	90341033	90346384	+		CTSS	NM_004079		M90696.1-319	chr9	90342939	90344093	1154	+	49
CTSV	NM_001333.4	chr9	99791958	99801424	-		CTSS	NM_004079		NM_004079.4-1867	chr9	99798356	99799587	1231	-	17
CYP4F11	NM_001128932.1	chr19	16023179	16045676	-		CYP4F35P	NR_026756		NR_026756.1-32	chr19	16032792	16034979	2187	-	35
CYP4F8	NM_007253.4	chr19	15726028	15741449	+		CYP4F35P	NR_026756		NR_026756.1-25	chr19	15733728	15734931	1203	+	37
DAPK3	NM_001348.3	chr19	3958450	3971097	-		BRSK1	NM_032430		NM_032430.1-11	chr19	3964679	3965092	413	-	11
DCHS1	NM_003737.4	chr11	6642560	6677040	-		CDH23	NM_001171930		NM_001171930.1-8	chr11	6650972	6651527	555	-	9
DCHS2	NM_001358235.2	chr4	155152893	155412951	-		KLHDC4	NM_017566		NM_017566.3-3	chr4	155294912	155295501	589	+	29
DDX25	NM_001330438.2	chr11	125773222	125798738	+		DDX51	NM_175066		NM_175066.3-235	chr11	125791083	125791793	710	+	14
DDX47	NM_201224.2	chr12	12966279	12982915	+		DDX52	NM_007010		NM_007010.3-2	chr12	12978932	12979672	740	+	12
DECR2	NM_020664.4	chr16	451884	462482	+		ATAD3B	NM_031921		AK127857.1-189	chr16	456503	457482	979	+	27
DHX34	NM_014681.6	chr19	47852571	47885961	+		n/a	NR_037861		AK126457.1-529	chr19	47877382	47878927	1545	+	53
DLL1	NM_005618.4	chr6	170591293	170600166	-		NOTCH4	NM_004557		BC144541.1-24	chr6	170592809	170594476	1667	-	11
DLX3	NM_005220.3	chr17	48067368	48072588	-		BARX1	NM_021570		NM_021570.3-16	chr17	48070761	48071310	549	-	35
DNAH10	NM_207437.3	chr12	124247041	124420267	+		TRIM16L	NM_001037330		AL080124.1-137	chr12	124325805	124326543	738	+	42
DNAH9	NM_001372.4	chr17	11501786	11873065	+		DNAH11	NM_003777		JQ247524.1-1	chr17	11592967	11593633	666	+	89
DNAJB1	NM_001313964.1	chr19	14625575	14640134	-		DNAJB2	NM_006736		NM_001039550.1-10	chr19	14628917	14629326	409	-	18
DNAJB7	NM_145174.2	chr22	41255552	41258117	-		DNAJB6	NM_058246		NM_058246.3-18	chr22	41257064	41258024	960	-	38
DPF3	NM_001280544.1	chr14	73127750	73359357	-		DPF1	NM_001135155		AK094632.1-7	chr14	73238382	73238681	299	-	14
DUSP27	NM_001080426.3	chr1	167063311	167098402	+		CEP131	NM_014984		BC144263.1-3	chr1	167095468	167095888	420	+	11
DYRK2	NM_003583.4	chr12	68042524	68059186	+		DYRK4	NM_003845		NM_003845.1-5	chr12	68051116	68052289	1173	+	58
DYRK3	NM_003582.3	chr1	206808880	206828520	+		DYRK4	NM_003845		NM_003845.1-2	chr1	206820843	206822118	1275	+	64
ECSIT	NM_016581.5	chr19	11616743	11639949	-		KATNBL1	NM_024713		AK297904.1-46	chr19	11618691	11619415	724	+	62
EFHB	NM_001330688.2	chr3	19920963	19988475	-		SLC25A45	NM_182556		AX746837.1-804	chr3	19977593	19977999	406	-	13
EGF	NM_001963.6	chr4	110834038	110934922	+		MYB	NM_001130173		AY787453.1-528	chr4	110883932	110885087	1155	-	39
ELANE	NM_001972.4	chr19	852302	856243	+		KLK10	NM_002776		AK309456.1-249	chr19	854866	856046	1180	+	61
ELMO3	NM_024712.5	chr16	67233033	67237907	+		ARSD	NM_001669		NM_001669.3-314	chr16	67234645	67235256	611	+	11
EMID1	NM_133455.4	chr22	29601884	29655586	+		DKFZp434L081	NM_001844		AL834148.1-50	chr22	29627956	29628365	409	+	9
EMILIN1	NM_007046.4	chr2	27301482	27309271	+		n/a	NR_026752		BC047736.1-19	chr2	27305384	27306216	832	+	39
EML5	NM_183387.3	chr14	89078774	89259297	-		n/a	noRefSeq		AK128433.1-686	chr14	89114715	89116854	2139	-	46
EP300	NM_001362843.2	chr22	41488595	41576081	+		BRDT	NM_001242810		NM_001242810.1-304	chr22	41552442	41553292	850	+	20
EPHA1	NM_005232.5	chr7	143088221	143105949	-		EPHA6	NM_173655		BC067287.1-15	chr7	143091925	143092600	675	-	31
EPHA8	NM_020526.5	chr1	22889981	22930088	+		EPHB4	NM_004444		EU826609.1-2	chr1	22902747	22903453	706	+	74
EPHB4	NM_004444.5	chr7	100400186	100425145	-		HERC2P7	NR_036470		NR_036470.1-1170	chr7	100403154	100403881	727	+	31
EPN3	NM_017957.3	chr17	48610095	48621111	+		EPN1	NM_001130071		NM_001130071.1-7	chr17	48613745	48615623	1878	+	27
ERCC6L	NM_001009954.3	chrX	71424514	71458877	-		ERCC6	NM_000124		NM_000124.2-2	chrX	71426800	71428343	1543	-	18
ESPN	NM_001367473.1	chr1	6484835	6521004	+		ATG9B	NM_173681		NR_073169.1-1	chr1	6484827	6485238	411	-	10
ESS2	NM_022719.3	chr22	19117791	19132164	-		MARK4	NM_031417		NM_001199867.1-25	chr22	19118964	19119610	646	+	11
EVPL	NM_001988.4	chr17	74002925	74023387	-		CROCC	NM_014675		NM_014675.3-20	chr17	74004293	74006575	2282	-	30
F10	NM_000504.4	chr13	113777112	113803843	+		HPN	NM_002151		AK095160.1-9	chr13	113803326	113803764	438	+	18
F7	NM_001267554.1	chr13	113760101	113774995	+		HGFAC	NM_001528		E07615.1-10	chr13	113771813	113773259	1446	+	58
FAM149A	NM_015398.3	chr4	187066040	187096444	+		RPSA	NM_002295		NM_002295.4-56	chr4	187078975	187080067	1092	+	86
FAM153B	NM_001265615.1	chr5	175490711	175541801	+		KIAA0752	NM_173663		AB018295.1-640	chr5	175535849	175536602	753	+	14
FAM184B	NM_015688.2	chr4	17630928	17783244	-		STAT5B	NM_012448		BC020868.1-476	chr4	17659299	17660178	879	-	30
FBF1	NM_001319193.1	chr17	73905654	73934313	-		EHBP1L1	NM_001099409		AK092750.1-516	chr17	73912988	73914886	1898	-	54
FBXO41	NM_001080410.4	chr2	73481817	73511606	-		KIF26A	NM_015656		NM_015656.1-9	chr2	73496023	73496890	867	-	11
FCGBP	NM_003890.2	chr19	40353962	40440533	-		VWF	NM_000552		E01056.1-5	chr19	40376595	40377120	525	-	5
FEV	NM_017521.3	chr2	219845808	219849906	-		ELK1	NM_001114123		NM_001257168.1-15	chr2	219846733	219847041	308	-	14
FGA	NM_000508.5	chr4	155504277	155511894	-		FGL1	NM_201553		NM_004467.3-3	chr4	155505291	155505944	653	-	47
FGFR1	NM_001174064.2	chr8	38268660	38326153	-		SLC38A7	NM_018231		AK022786.1-398	chr8	38273985	38275005	1020	-	34
FGL2	NM_006682.3	chr7	76822685	76829136	-		ANGPT2	NM_001147		NM_001118887.1-425	chr7	76825726	76826246	520	-	8
FIZ1	NM_032836.3	chr19	56102741	56110883	-		LOC155060	NR_036573		NR_036573.1-352	chr19	56103795	56105469	1674	-	41
FLI1	NM_001167681.2	chr11	128563810	128683162	+		ELK1	NM_001114123		NM_001257168.1-7	chr11	128680369	128680677	308	+	14
FLJ44635	NM_207422.2	chrX	71364033	71381600	+		TPT1	NM_003295		NM_003295.2-27	chrX	71379602	71380405	803	+	96
FLNC	NM_001458.4	chr7	128470482	128499328	+		FLNA	NM_001110556		NM_001110556.1-5	chr7	128484673	128485295	622	+	7
FLT3	NM_004119.3	chr13	28577410	28674713	-		HCCS-4	NR_033882		AF465843.1-290	chr13	28591805	28592735	930	-	15
FOXA2	NM_153675.3	chr20	22561635	22566128	-		FOXH1	NM_003923		NM_003923.2-17	chr20	22562798	22563442	644	-	25
FOXA3	NM_004497.3	chr19	46367583	46377055	+		FOXH1	NM_003923		NM_003923.2-15	chr19	46375299	46376059	760	+	30
FOXF1	NM_001451.3	chr16	86544132	86549028	+		FOXH1	NM_003923		NM_003923.2-10	chr16	86544041	86544550	509	+	19
FOXF2	NM_001452.2	chr6	1389810	1395838	+		FOXH1	NM_003923		NM_003923.2-22	chr6	1390236	1390713	477	+	21
FOXI1	NM_144769.3	chr5	169532900	169536738	+		FOXK1	NM_001037165		AX721095.1-20	chr5	169533003	169533548	545	-	32
FOXI2	NM_207426.3	chr10	129535448	129539447	+		FOXH1	NM_003923		NM_003923.2-5	chr10	129535650	129536035	385	+	17
FOXI3	NM_001135649.3	chr2	88746305	88752211	-		FOXK1	NM_001037165		NM_001037165.1-224	chr2	88751407	88752414	1007	-	7
FOXK1	NM_001037165.2	chr7	4721925	4811073	+		CCDC88B	NM_032251		NM_032251.5-22	chr7	4721707	4723412	1705	-	29
FOXO3B	NM_001368134.1	chr17	18570941	18585627	-		FOXO3	NM_001455		NM_001455.3-7	chr17	18569235	18576494	7259	-	98
FYCO1	NM_024513.4	chr3	45959394	46037316	-		MYH7B	NM_020884		NM_020884.3-38	chr3	46007802	46010105	2303	-	28
GABRB3	NM_021912.5	chr15	26788698	27018910	-		SCARF1	NR_028076		NR_028075.1-169	chr15	27018314	27018856	542	-	15
GAL3ST1	NM_001318104.2	chr22	30950621	30970652	-		GAL3ST2	NM_022134		NM_022134.2-6	chr22	30950993	30952061	1068	-	70
GALNT4	NM_003774.5	chr12	89913188	89918573	-		GALNT14	NM_001253827		NM_001253827.1-7	chr12	89917007	89917927	920	-	35
GALR1	NM_001480.4	chr18	74961803	74989856	+		KISS1R	NM_032551		NM_032551.4-15	chr18	74962463	74963743	1280	+	66
GALR2	NM_003857.4	chr17	74070861	74073618	+		KISS1R	NM_032551		NM_032551.4-14	chr17	74070792	74073309	2517	+	65
GANC	NM_001301409.1	chr15	42565855	42607031	+		BNIP3	NM_004052		NM_004052.2-8	chr15	42605806	42607401	1595	+	89
GDF3	NM_020634.3	chr12	7842379	7848371	-		BMP8B	NM_001720		NM_001720.3-82	chr12	7842480	7842781	301	-	7
GDF5	NM_000557.5	chr20	34021144	34026008	-		BMP7	NM_001719		NM_001719.2-310	chr20	34021705	34022000	295	-	7
GDF7	NM_182828.4	chr2	20866903	20879003	+		BMP7	NM_001719		NM_001719.2-270	chr2	20870890	20871186	296	+	7
GEMIN5	NM_015465.5	chr5	154266970	154317771	-		NPFFR2	NM_001144756		NM_053036.2-541	chr5	154292340	154293321	981	-	40
GLB1	NM_001079811.2	chr3	33038099	33138324	-		SUMO2	NM_006937		NM_006937.3-37	chr3	33118578	33119573	995	+	93
GLDC	NM_000170.2	chr9	6532463	6645692	-		C20orf27	NM_001258430		AK097645.1-6	chr9	6645129	6645838	709	-	35
GNA12	NM_007353.3	chr7	2767738	2883942	-		GNAS	NM_080425		NM_016592.2-16	chr7	2770801	2771333	532	-	20
GNA13	NM_001282425.1	chr17	63005406	63051892	-		GNAL	NM_001142339		NM_001142339.2-213	chr17	63010374	63010885	511	-	8
GNAZ	NM_002073.4	chr22	23412704	23467219	+		GNAS	NM_080425		NM_001077490.1-14	chr22	23437987	23438604	617	+	13
GOLGA6A	NM_001038640.2	chr15	74362197	74374891	-		FLJ00313	NR_026752		AK090414.1-201	chr15	74365992	74367021	1029	-	15
GOLGA6C	NM_001164404.1	chr15	75550898	75565796	+		FLJ00313	NR_026752		AK090414.1-204	chr15	75558766	75559795	1029	+	15
GOLGA6D	NM_001145224.1	chr15	75575181	75588148	+		FLJ00313	NR_026752		AK090414.1-205	chr15	75583042	75584071	1029	+	15
GOLGA6L1	NM_001001413.3	chr15	22736245	22746002	+		SCNM1	NM_001204856		NR_037937.1-301	chr15	22740730	22741604	874	-	32
GOLGA6L9	NM_198181.3	chr15	82722184	82731587	+		n/a	noRefSeq		AK098200.1-78	chr15	82724362	82726719	2357	+	72
GOLGA8T	NM_001355469.1	chr15	30427253	30437770	+		n/a	NR_033579		AK125436.1-16	chr15	30437031	30444732	7701	-	58
GPR132	NM_001278695.2	chr14	105515731	105531767	-		CYP1A2	NM_000761		NM_000761.3-483	chr14	105517936	105519823	1887	+	44
GPR142	NM_001331077.1	chr17	72363644	72368739	+		ATP5F1B	NM_001686		NM_001686.3-2	chr17	72362976	72364126	1150	+	43
GPR35	NM_001195382.2	chr2	241544846	241570670	+		GPR54	NM_032551		AF343725.1-20	chr2	241569340	241570096	756	+	57
GPRC5B	NM_016235.3	chr16	19868012	19896170	-		ATP5G2	NM_005176		AK075351.1-344	chr16	19883821	19884823	1002	-	35
GPSM1	NM_015597.6	chr9	139221994	139236290	+		BRF1	NM_001519		NM_001242788.1-3	chr9	139222114	139222706	592	+	15
GRIN3B	NM_138690.3	chr19	1000417	1009731	+		GRIN1	NM_007327		NM_000832.6-4	chr19	1004846	1005564	718	+	16
GRK7	NM_139209.2	chr3	141497042	141535892	+		GRK6	NM_001004105		NM_001004105.2-22	chr3	141497134	141499660	2526	+	51
GRM2	NM_000839.5	chr3	51741083	51752629	+		GRM8	NR_028041		NM_000845.2-9	chr3	51743060	51750137	7077	+	50
GRM3	NM_000840.2	chr7	86273229	86494192	+		GRM5	NM_001143831		FJ588507.1-15	chr7	86415582	86416433	851	+	35
GSC2	NM_005315.1	chr22	19136503	19137796	-		ARX	NM_139058		NM_139058.2-50	chr22	19136566	19137708	1142	-	30
GTF3C5	NM_001286709.1	chr9	135906061	135933890	+		EEF1A1	NM_001402		NM_001402.5-644	chr9	135894809	135915133	20324	+	57
GUCY1A2	NM_001256424.2	chr11	106544744	106889202	-		GUCY1B1	NM_000857		NM_000857.2-2	chr11	106680690	106681194	504	-	14
HAND2	NM_021973.3	chr4	174447241	174451380	-		TAL1	NM_003189		AB464287.1-10	chr4	174449862	174450721	859	-	72
HCG4	NR_002139.2	chr6_qbl_hap6	1059611	1061631	-		HCG4	NR_002139		NR_002139.2-105	chr6_qbl_hap6	1059611	1061631	2020	-	96
HDGFL3	NM_016073.4	chr15	83796504	83876575	-		PSIP1	NM_033222		NM_033222.3-3	chr15	83876080	83876594	514	-	11
HEATR4	NM_203309.2	chr14	73945188	74025651	-		RIOX2	NM_001042533		NM_001042533.2-2	chr14	73958675	73959088	413	+	7
HELZ2	NM_033405.3	chr20	62189438	62199107	-		n/a	NR_002931		AK123140.1-371	chr20	62196760	62197182	422	-	20
HES2	NM_019089.5	chr1	6475291	6479979	-		HES4	NM_001142467		NM_021170.3-4	chr1	6478866	6479780	914	-	78
HES5	NM_001010926.4	chr1	2460183	2461702	-		HES4	NM_001142467		NM_021170.3-2	chr1	2460857	2461781	924	-	80
HES6	NM_018645.6	chr2	239146907	239148679	-		HES4	NM_001142467		NM_021170.3-8	chr2	239147833	239148693	860	-	74
HHIPL1	NM_001127258.2	chr14	100111446	100146906	+		CD6	NM_006725		NM_001254751.1-38	chr14	100141484	100142088	604	+	17
HIPK2	NM_022740.5	chr7	139246315	139477797	-		CLK3	NM_001130028		AK225680.1-11	chr7	139415829	139416362	533	-	28
HIPK4	NM_144685.5	chr19	40885177	40896088	-		SRPK3	NM_014370		AB209155.1-286	chr19	40895377	40897087	1710	-	32
HK1	NM_033497.2	chr10	71029755	71161638	+		RPS15A	NM_001030009		NM_001030009.1-9	chr10	71060146	71060603	457	-	93
HLA-F	NM_001098479.2	chr6_mann_hap4	991715	995580	+		RPL23A	NM_000984		AK130965.1-100	chr6_mann_hap4	994904	995436	532	-	98
HLCS	NM_001242785.2	chr21	38120925	38353294	-		ATAD3B	NM_031921		AK097309.1-572	chr21	38338035	38339319	1284	+	37
HMX3	NM_001105574.2	chr10	124895485	124898939	+		NANOG	NM_024865		NM_024865.2-71	chr10	124896810	124897966	1156	+	35
HNRNPH2	NM_019597.5	chrX	100663209	100669121	+		HNRNPH1	NM_001257293		NM_001257293.1-17	chrX	100666973	100669117	2144	+	91
HNRNPUL2	NM_001079559.3	chr11	62480101	62494929	-		C1orf35	NM_024319		AK126087.1-79	chr11	62494065	62494769	704	-	16
HPCA	NM_002143.3	chr1	33352091	33360247	+		KCNIP2	NM_014591		NM_014591.4-1	chr1	33354523	33354877	354	+	13
HPCAL1	NM_001258359.1	chr2	10508889	10567743	+		NCS1	NM_014286		NM_014286.3-3	chr2	10559807	10560258	451	+	8
HPCAL4	NM_016257.4	chr1	40144319	40157105	-		GUCA1B	NM_002098		NM_002098.5-22	chr1	40148558	40149925	1367	-	36
HRH2	NM_001131055.2	chr5	175085073	175113245	+		DRD2	NM_000795		M30625.1-41	chr5	175110317	175111156	839	+	33
HS3ST6	NM_001009606.4	chr16	1961475	1968416	-		RGS11	NM_003834		AB209582.1-120	chr16	1960742	1962353	1611	+	26
HSBP1L1	NM_001136180.2	chr18	77724642	77730822	+		DKFZp564L232	NM_014714		AL080069.1-7	chr18	77724361	77724993	632	-	16
HSD3B1	NM_001328615.1	chr1	120049825	120057681	+		HSD3B7	NM_001142777		NM_025193.3-58	chr1	120056455	120057189	734	+	29
HSF5	NM_001080439.3	chr17	56497527	56565769	-		HSF4	NM_001040667		NM_001538.3-5	chr17	56565213	56565945	732	-	22
HSP90AA1	NM_001017963.3	chr14	102547078	102606086	-		HSP90B1	NM_003299		AK025459.1-7	chr14	102548448	102552673	4225	-	33
HSPA1A	NM_005345.6	chr6_cox_hap2	3292899	3295299	+		HSPA8	NM_006597		BC016660.1-45	chr6_cox_hap2	3293070	3295040	1970	+	86
HSPA1B	NM_005346.6	chr6_cox_hap2	3305096	3307616	+		HSPA8	NM_006597		BC016179.1-46	chr6_cox_hap2	3305268	3307236	1968	+	86
HSPG2	NM_001291860.2	chr1	22148736	22263803	-		CCM2	NM_001029835		AK303216.1-9	chr1	22206320	22206983	663	-	43
HTATSF1	NM_001163280.1	chrX	135579237	135594505	+		AK9	NM_001145128		AK124171.1-1050	chrX	135593186	135593810	624	+	26
IDO2	NM_194294.2	chr8	39792473	39873910	+		PLK4	NM_014264		NM_014264.4-6	chr8	39792205	39795695	3490	+	60
IFFO2	NM_001136265.2	chr1	19230773	19283170	-		SRRM3	NM_001110199		NM_001110199.1-1	chr1	19282014	19283061	1047	+	24
IGFALS	NM_004970.2	chr16	1840413	1843734	-		PODN	NM_001199080		NM_153703.4-11	chr16	1840870	1842102	1232	-	35
INA	NM_032727.4	chr10	105036894	105050103	+		LMNA	NM_005572		NM_005572.3-10	chr10	105037061	105038062	1001	+	43
ING1	NM_198218.2	chr13	111365609	111373421	+		ING4	NM_001127582		NM_001127585.1-3	chr13	111371680	111372242	562	+	37
IQCN	NM_001145305.2	chr19	18367907	18385262	-		MYO3B	NM_138995		AF391558.1-284	chr19	18367144	18368193	1049	-	13
IRF2BP2	NM_001077397.1	chr1	234740014	234745271	-		KIAA1865	NM_024496		AB058768.1-1	chr1	234742882	234745628	2746	-	59
IRX1	NM_024337.4	chr5	3595945	3601517	+		IRX4	NM_016358		NM_016358.2-16	chr5	3599372	3600151	779	+	31
IRX3	NM_024336.3	chr16	54317215	54320699	-		IRX4	NM_016358		BC144204.1-6	chr16	54318473	54319987	1514	-	66
IRX5	NM_005853.6	chr16	54964776	54968397	+		IRX6	NM_024335		NM_024335.2-3	chr16	54966427	54966916	489	+	20
ISL2	NM_145805.3	chr15	76629113	76634816	+		MIB2	NM_080875		NR_033183.1-7	chr15	76630316	76630904	588	+	15
ITGB3BP	NM_001206739.1	chr1	63906440	63988944	-		MCF2L2	NM_015078		NM_015078.2-26	chr1	63918190	63924058	5868	-	26
ITGB4	NM_001321123.2	chr17	73717538	73753899	+		P3H4	NM_006455		NM_006455.2-749	chr17	73746827	73747838	1011	+	30
ITIH6	NM_198510.3	chrX	54775350	54824688	-		ITIH1	NM_002216		M33033.1-4	chrX	54784677	54785433	756	-	47
JAG2	NM_002226.5	chr14	105607331	105635113	-		NOTCH1	NM_017617		BC032414.1-14	chr14	105616923	105617909	986	+	17
KBTBD4	NM_001318716.1	chr11	47593748	47600323	-		SEC31B	NM_015490		AK128343.1-71	chr11	47598246	47599450	1204	-	32
KCNK13	NM_022054.4	chr14	90528337	90652197	+		KCNK4	NM_033310		BC033577.1-7	chr14	90528491	90528936	445	+	28
KCNK3	NM_002246.3	chr2	26915589	26956288	+		KCNK4	NM_033310		BC033577.1-10	chr2	26950484	26951190	706	+	29
KCNMB3	NM_171828.2	chr3	178960551	178984838	-		LRRFIP1	NM_001137552		NM_001137552.1-526	chr3	178975043	178979355	4312	-	95
KCNT1	NM_001272003.2	chr9	138594030	138687348	+		C1orf122	NM_198446		NM_198446.2-6	chr9	138606357	138606957	600	-	42
KCNV2	NM_133497.4	chr9	2717509	2730037	+		KCNV1	NM_014379		NM_014379.2-29	chr9	2718039	2719094	1055	+	31
KCTD14	NM_001282406.1	chr11	77726760	77757237	-		KCTD7	NM_153033		NM_001167961.2-1	chr11	77727732	77728335	603	-	14
KDM1A	NM_015013.4	chr1	23345960	23410182	+		UBE2Q2P1	NR_003661		NR_003661.2-10	chr1	23379896	23381267	1371	-	45
KDM4C	NM_001146696.2	chr9	6720862	7077263	+		CDC42	NM_001039802		NM_001039802.1-148	chr9	6719593	6722070	2477	+	34
KDM5A	NM_001042603.3	chr12	389222	498486	-		TM4SF20	NM_024795		AK026453.1-74	chr12	405183	406245	1062	-	39
KHDC1	NM_001251874.2	chr6	73951036	74019882	-		EIF3E	NM_001568		NM_001568.2-7	chr6	74001658	74003142	1484	+	97
KIF17	NM_001287212.2	chr1	20990506	21044500	-		DKFZp686O248	NM_020759		CR627426.1-1	chr1	21030970	21031422	452	-	6
KIF22	NM_001256269.2	chr16	29802071	29816705	+		KIF19	NM_153209		BC026362.1-113	chr16	29809778	29811934	2156	+	50
KIF24	NM_194313.4	chr9	34252377	34329266	-		SERPINH1	NM_001207014		NM_001207014.1-2	chr9	34318271	34320332	2061	+	88
KIF27	NM_001354069.2	chr9	86449013	86536347	-		KIF21B	NM_001252103		AK131318.1-248	chr9	86518401	86518850	449	-	14
KIF3B	NM_004798.4	chr20	30865453	30922814	+		KIF13B	NM_015254		NM_015254.3-6	chr20	30897606	30898782	1176	+	12
KIF3C	NM_002254.8	chr2	26149466	26205366	-		KIF5A	NM_004984		NM_004984.2-6	chr2	26203197	26204537	1340	-	30
KIFC1	NM_002263.4	chr6	33359599	33377673	+		KIFC2	NM_145754		NM_145754.2-15	chr6	33372745	33373334	589	+	12
KL	NM_004795.4	chr13	33590560	33640280	+		LCTL	NM_207338		NM_207338.2-1	chr13	33590659	33591391	732	+	30
KLB	NM_175737.4	chr4	39408549	39453153	+		LCTL	NM_207338		NM_207338.2-10	chr4	39408799	39409349	550	+	22
KLHL17	NM_198317.3	chr1	895963	901099	+		KEAP1	NM_012289		HV708927.1-1	chr1	896487	898884	2397	+	41
KLHL20	NM_014458.4	chr1	173684119	173755830	+		KLHL2	NM_001161521		NM_001161521.1-2	chr1	173702985	173703442	457	+	14
KLHL21	NM_014851.4	chr1	6650783	6662929	-		KLHL17	NM_198317		NM_198317.2-3	chr1	6662095	6663065	970	-	35
KLHL24	NM_001349414.1	chr3	183353410	183402307	+		KLHL2	NR_026575		DQ893638.2-12	chr3	183368342	183369025	683	+	36
KLHL26	NM_001345981.2	chr19	18747837	18781324	+		KEAP1	NM_012289		AB383759.2-8	chr19	18778467	18779978	1511	+	71
KLHL31	NM_001003760.5	chr6	53512713	53530554	-		KLHL36	NM_024731		NM_024731.2-18	chr6	53516467	53517147	680	-	29
KLHL38	NM_001081675.3	chr8	124656681	124666041	-		KLHL30	NM_198582		BC103703.1-11	chr8	124663997	124665046	1049	-	80
KLK10	NM_145888.3	chr19	51515994	51522965	-		CFD	NM_001928		M84526.1-42	chr19	51519702	51520478	776	-	54
KMT2B	NM_014727.2	chr19	36208920	36229781	+		SETD1A	NM_014712		NM_014712.1-5	chr19	36228969	36229533	564	+	7
LAMC3	NM_006059.4	chr9	133884560	133969860	+		RHBG	NR_046115		NR_046115.1-97	chr9	133928023	133929218	1195	-	37
LATS1	NM_001350339.2	chr6	149979288	150039237	-		DKFZp434B079	NM_152720		AL833951.1-331	chr6	150000293	150001293	1000	-	16
LATS2	NM_014572.3	chr13	21547174	21635725	-		RPS6KA1	NM_001006665		NM_001006665.1-10	chr13	21557404	21557833	429	-	13
LBX2	NM_001282430.2	chr2	74724643	74726730	-		SHOX	NM_000451		NM_006883.2-499	chr2	74724684	74725386	702	-	31
LCT	NM_002299.4	chr2	136545419	136594754	-		LCTL	NM_207338		NM_207338.2-7	chr2	136564782	136567292	2510	-	62
LHFPL3	NM_199000.2	chr7	103969103	104549005	+		ZNF703	NM_025069		NM_025069.1-11	chr7	103968922	103969890	968	+	36
LIMK1	NM_002314.4	chr7	73498133	73536855	+		CAMK1D	NM_020397		NM_020397.2-758	chr7	73526264	73527156	892	+	47
LIMK2	NM_005569.4	chr22	31608283	31676066	+		PPP1R14B	NM_138689		NM_138689.2-6	chr22	31672422	31673401	979	+	93
LLGL2	NM_004524.3	chr17	73521777	73571290	+		CCDC114	NM_144577		BC007730.2-243	chr17	73565570	73567109	1539	+	36
LMOD1	NM_012134.3	chr1	201865583	201915676	-		TMOD2	NM_014548		HQ448074.1-2	chr1	201868756	201869177	421	-	36
LMOD2	NM_207163.3	chr7	123295919	123304344	+		TMOD1	NM_003275		NM_001166116.1-5	chr7	123302221	123302659	438	+	13
LOC100132202	NM_001365373.1	chr15	28798615	28807580	+		n/a	NR_001555		AF332229.1-23	chr15	28804765	28807094	2329	+	62
LRP4	NM_002334.4	chr11	46878267	46940101	-		FBLN5	NM_006329		BX248290.1-10	chr11	46916748	46917133	385	-	15
LRRC32	NM_001370191.1	chr11	76368567	76381791	-		PODNL1	NM_024825		NM_001146254.1-125	chr11	76371258	76372366	1108	-	25
LRSAM1	NM_138361.5	chr9	130213764	130265780	+		COG7	NM_153603		NM_153603.3-331	chr9	130257397	130258305	908	-	23
LTBP2	NM_000428.3	chr14	74964885	75078940	-		FBLN2	NM_001165035		AK129883.1-6	chr14	74975552	74976110	558	-	11
LTBP3	NM_021070.4	chr11	65306029	65325699	-		FBLN2	NM_001165035		AK129883.1-3	chr11	65307543	65308123	580	-	13
LTBP4	NM_003573.2	chr19	41099071	41135725	+		ADAMTSL5	NM_213604		NM_213604.2-169	chr19	41135256	41136336	1080	+	32
LYST	NM_000081.4	chr1	235824340	236030206	-		LDHA	NM_001165414		NM_005566.3-2	chr1	235901191	235902909	1718	+	74
LZTS1	NM_001362884.2	chr8	20103675	20131046	-		FLJ00103	NM_001080542		AK074045.1-9	chr8	20107372	20107737	365	-	7
LZTS3	NM_001365618.1	chr20	3143262	3154195	-		DEF6	NM_022047		BC007702.2-55	chr20	3146209	3146502	293	-	13
MAGEA11	NM_001011544.2	chrX	148769858	148798928	+		MAGED1	NM_006986		CU689387.1-39	chrX	148798004	148798378	374	-	30
MAGEC3	NM_138702.1	chrX	140926101	140985618	+		MAGEB16	NM_001099921		NM_001099921.1-49	chrX	140984324	140985966	1642	+	81
MAP3K19	NM_025052.4	chr2	135722060	135782248	-		MAP3K3	NM_002401		AK308152.1-4	chr2	135738421	135738948	527	-	35
MAPK3	NM_001040056.3	chr16	30128157	30134541	-		EMR2	NM_013447		BC034949.1-19	chr16	30129105	30130493	1388	-	28
MAPK4	NM_001292039.2	chr18	48086456	48258196	+		MAPK12	NM_002969		NM_002969.3-13	chr18	48190376	48190847	471	+	23
MAPK7	NM_002749.4	chr17	19281810	19286857	+		MAPK14	NM_001315		NM_139012.2-3	chr17	19283981	19284638	657	+	14
MAPT	NM_016835.4	chr17_ctg5_hap1	762279	895830	-		HSD17B7	NM_016371		AK022929.1-399	chr17_ctg5_hap1	796146	796955	809	+	30
MASP1	NM_001879.5	chr3	186933872	187009810	-		HPN	NM_002151		AK095160.1-46	chr3	186953652	186954405	753	-	28
MCHR1	NM_005297.3	chr22	41075181	41078818	+		MCHR2	NM_001040179		NM_001040179.1-70	chr22	41076991	41077836	845	+	30
MCM4	NM_182746.3	chr8	48873500	48890720	+		MCM5	NM_006739		NM_006739.3-7	chr8	48883136	48883461	325	+	12
MCM7	NM_182776.2	chr7	99690350	99698403	-		MCM5	NM_006739		NM_006739.3-6	chr7	99693508	99695015	1507	-	12
MEGF6	NM_001409.4	chr1	3404514	3528072	-		MEGF11	NM_032445		NM_032445.2-1	chr1	3410335	3411282	947	-	13
MFHAS1	NM_004225.3	chr8	8640863	8751140	-		CRIB1	NM_182706		AF240677.1-10	chr8	8749275	8750555	1280	-	19
MGA	NM_001080541.2	chr15	41952609	42062141	+		TBX20	NM_001166220		NM_001166220.1-7	chr15	41961306	41961872	566	+	39
MIB1	NM_020774.3	chr18	19321289	19450918	+		MIB2	NM_080875		NM_001170689.1-7	chr18	19321170	19321837	667	+	20
MIB2	NM_001170687.2	chr1	1550879	1565985	+		CASKIN1	NM_020764		NM_020764.3-1	chr1	1562517	1563190	673	+	10
MIPEP	NM_005932.4	chr13	24304327	24463539	-		n/a	NR_038939		BX648740.1-55	chr13	24460220	24463377	3157	-	90
MIXL1	NM_031944.3	chr1	226411364	226414761	+		VSX1	NR_045948		NR_045948.1-8	chr1	226411301	226411861	560	+	22
MLX	NM_170607.2	chr17	40719077	40725221	+		PBLD	NM_022129		AK027673.1-425	chr17	40723175	40723890	715	-	29
MMP11	NM_005940.5	chr22	24115035	24126503	+		MMP25	NM_022468		NM_022468.4-12	chr22	24122564	24123550	986	+	18
MMP14	NM_004995.4	chr14	23305793	23316967	+		MMP2	NM_001127891		NM_001127891.1-12	chr14	23311615	23312628	1013	+	18
MMP17	NM_016155.7	chr12	132312937	132336316	+		MMP23B	NM_006983		NM_006983.1-5	chr12	132324834	132325400	566	+	41
MMP19	NM_002429.6	chr12	56229216	56236720	-		MMP13	NM_002427		AY256443.1-41	chr12	56232899	56233517	618	-	32
MMRN2	NM_024756.2	chr10	88695296	88717425	-		SPTBN4	NM_020971		AY004226.1-3	chr10	88702689	88703466	777	-	8
MRTFB	NM_014048.4	chr16	14165169	14360636	+		TVP23B	NM_016078		NM_016078.4-4	chr16	14294188	14295979	1791	+	97
MST1R	NM_002447.4	chr3	49924434	49941306	-		PIK3C2B	NM_002646		AK308153.1-55	chr3	49928316	49928679	363	-	12
MYBPC3	NM_000256.3	chr11	47352956	47374253	-		HRAT92	NR_033963		NR_033963.1-41	chr11	47369000	47370473	1473	+	35
MYH11	NM_001040113.2	chr16	15796991	15950885	-		MYH7B	NM_020884		AK000947.1-371	chr16	15930437	15932022	1585	-	71
MYH14	NM_024729.3	chr19	50706884	50813801	+		n/a	NR_003587		AK074680.1-854	chr19	50726475	50727207	732	+	15
MYH3	NM_002470.4	chr17	10531848	10560626	-		CEP131	NM_014984		BC144263.1-12	chr17	10541416	10541763	347	-	9
MYH7B	NM_020884.5	chr20	33543670	33590240	+		TNIP1	NM_001252385		AK074400.1-4	chr20	33588117	33588963	846	+	26
MYL9	NM_181526.3	chr20	35169921	35179850	+		MYL6B	NM_001199629		AK304594.1-401	chr20	35173229	35174258	1029	+	67
MYO15B	NM_001309242.1	chr17	73584138	73622929	+		BMP8A	NM_181809		NM_181809.3-182	chr17	73608470	73609860	1390	-	23
MYO9B	NM_004145.4	chr19	17186586	17324095	+		CCDC114	NM_144577		NM_144577.3-279	chr19	17272314	17273944	1630	+	28
NARF	NM_031968.2	chr17	80416539	80446143	+		FLJ00313	NR_026752		AK090414.1-306	chr17	80416084	80417668	1584	+	18
NCALD	NM_001040625.1	chr8	102698769	103136562	-		NCS1	NM_014286		NM_014286.3-4	chr8	102731482	102731866	384	-	7
NCAPH2	NM_152299.4	chr22	50946652	50963209	+		SCO1	NM_004589		NM_004589.2-3	chr22	50962107	50962489	382	-	21
NDUFC2-KCTD14	NM_001203261.2	chr11	77726760	77790908	-		KCTD7	NM_153033		NM_001167961.2-1	chr11	77727732	77728335	603	-	14
NEFL	NM_006158.4	chr8	24808467	24814383	-		KRT14	NM_000526		NM_000526.4-209	chr8	24813024	24813762	738	-	39
NEFM	NM_005382.2	chr8	24771273	24776606	+		KRT14	NM_000526		NM_000526.4-208	chr8	24771602	24772381	779	+	43
NEK4	NM_003157.6	chr3	52742459	52804956	-		DKFZp434B079	NM_152720		AL833951.1-272	chr3	52801423	52802559	1136	-	17
NELL1	NM_001288713.1	chr11	20691096	21597232	+		IDH3G	NM_174869		NM_004135.3-1	chr11	21305327	21306626	1299	+	85
NFKBIB	NM_001243116.1	chr19	39390339	39399534	+		PHYHD1	NM_001100876		NM_174933.3-334	chr19	39396770	39398232	1462	+	52
NKX1-2	NM_001146340.3	chr10	126133811	126138604	-		NKX6-2	NM_177400		NM_177400.2-8	chr10	126136194	126136728	534	-	47
NKX2-1	NM_003317.4	chr14	36985601	36988761	-		SHOX	NM_000451		NM_000451.3-84	chr14	36986513	36987098	585	-	14
NKX2-4	NM_033176.2	chr20	21376002	21378164	-		MNX1	NM_005515		NM_005515.3-54	chr20	21376616	21378029	1413	-	53
NKX6-2	NM_177400.3	chr10	134596684	134599651	-		ARX	NM_139058		NM_139058.2-15	chr10	134598635	134599636	1001	-	29
NLGN3	NM_001321276.2	chrX	70364690	70391051	+		CES2	NR_036684		NM_003869.5-485	chrX	70383988	70388596	4608	+	37
NLRC5	NM_032206.4	chr16	57050985	57117436	+		PHRF1	NM_020901		BC112931.1-9	chr16	57055258	57056329	1071	+	11
NLRP2	NM_017852.5	chr19	55477741	55512506	+		NLRP12	NM_144687		NM_144687.2-217	chr19	55493659	55502920	9261	+	57
NLRP5	NM_153447.4	chr19	56511091	56573176	+		NLRP12	NM_144687		NM_144687.2-221	chr19	56538406	56544618	6212	+	48
NLRP7	NM_001127255.1	chr19	55434876	55458873	-		NLRP12	NM_144687		NM_144687.2-216	chr19	55444039	55451678	7639	-	52
NOP53	NM_015710.5	chr19	48248802	48260315	+		PIK3C2B	NM_002646		AK308153.1-44	chr19	48252959	48253514	555	-	16
NOTCH1	NM_017617.5	chr9	139388884	139440500	-		CRB2	NM_173689		NM_173689.5-37	chr9	139401217	139402144	927	-	13
NOTCH3	NM_000435.3	chr19	15269848	15311806	-		DLK2	NM_023932		AK055380.1-133	chr19	15302541	15303643	1102	-	43
NOVA2	NM_002516.4	chr19	46436991	46477123	-		PCBP4	NM_001174100		NM_020418.3-3	chr19	46443217	46443695	478	-	20
NR1H3	NM_001130102.3	chr11	47270445	47290584	+		VDR	NM_001017536		BC033465.1-4	chr11	47282007	47283279	1272	+	13
NR2F6	NM_005234.3	chr19	17342693	17356151	-		THRA	NM_003250		NM_001190918.1-18	chr19	17355755	17356643	888	-	27
NRBF2	NM_030759.5	chr10	64893087	64914784	+		DIS3L2	NR_046477		NM_001257281.1-3	chr10	64913296	64914038	742	+	27
NRXN1	NM_001330093.1	chr2	50145642	51259674	-		NRXN2	NM_015080		NM_015080.3-10	chr2	51254570	51255445	875	-	12
NT5C1B-RDH14	NM_001199104.1	chr2	18735988	18770846	-		RDH11	NM_016026		CR457180.1-5	chr2	18736461	18737076	615	-	61
NT5DC1	NM_152729.3	chr6	116422015	116570660	+		COL11A1	NM_080629		NM_001190709.1-28	chr6	116441712	116443101	1389	-	17
NTN1	NM_004822.3	chr17	8924826	9147317	+		LAMC3	NM_006059		NM_006059.3-6	chr17	8925695	8926707	1012	+	15
NTN3	NM_006181.3	chr16	2521297	2524146	+		LAMC1	NM_002293		NM_002293.3-2	chr16	2521413	2522859	1446	+	15
NTRK1	NM_001007792.1	chr1	156785541	156851642	+		EPHA10	NM_001099439		BC041360.1-18	chr1	156849413	156849926	513	+	21
NTRK2	NM_006180.4	chr9	87283372	87641985	+		AATK	NM_001080395		AK131395.1-17	chr9	87570070	87570445	375	+	7
NTSR1	NM_002531.3	chr20	61340187	61394123	+		OPRK1	NM_000912		NM_000912.3-317	chr20	61340293	61341086	793	+	13
NUDT10	NM_153183.3	chrX	51075082	51080377	+		NUDT4	NR_002212		AF191650.1-11	chrX	51075802	51077155	1353	+	90
NUDT9	NM_024047.5	chr4	88343724	88380607	+		MAEL	NM_032858		BC034310.1-511	chr4	88372670	88373457	787	-	27
NUP188	NM_015354.3	chr9	131709977	131769375	+		PDXDC1	NM_015027		AK090552.1-763	chr9	131760018	131761036	1018	-	26
OBSL1	NM_015311.3	chr2	220415449	220436261	-		SERPINB6	NM_004568		AK122895.1-719	chr2	220420036	220420913	877	+	39
ONECUT3	NM_001080488.2	chr19	1753504	1780987	+		CUX2	NM_015267		NM_015267.3-2	chr19	1754037	1754998	961	+	12
OPRL1	NM_000913.6	chr20	62711434	62731986	+		KISS1R	NM_032551		NM_032551.4-27	chr20	62729147	62730061	914	+	46
OTOA	NM_144672.4	chr16	21675288	21772050	+		RPS6KL1	NM_031464		AK054800.1-249	chr16	21725851	21727153	1302	-	53
OTOL1	NM_001080440.1	chr3	161214595	161221730	+		COL6A1	NM_001848		M20776.1-16	chr3	161220827	161221303	476	+	43
P2RY11	NM_002566.5	chr19	10222368	10226048	+		TACR2	NM_001057		BC033742.1-15	chr19	10224406	10225087	681	+	29
PAK4	NM_001014835.2	chr19	39616425	39673456	+		SPNS1	NM_032038		AK289787.1-295	chr19	39666897	39667677	780	+	47
PALB2	NM_024675.4	chr16	23614485	23652631	-		VENTX	NM_014468		NM_014468.2-352	chr16	23651678	23652592	914	-	27
PALM	NM_001040134.2	chr19	708934	748329	+		RPS6KL1	NM_031464		AK054800.1-355	chr19	733504	734537	1033	+	52
PARP6	NM_001323523.2	chr15	72533521	72564895	-		KIF4A	NM_012310		BC050548.1-179	chr15	72551833	72552658	825	+	17
PAX1	NM_006192.5	chr20	21686301	21699119	+		PAX5	NM_016734		NM_016734.1-8	chr20	21687064	21687683	619	+	14
PAX9	NM_001372076.1	chr14	37131064	37148567	+		PAX5	NM_016734		AF080573.1-4	chr14	37132244	37132724	480	+	95
PBX4	NM_025245.3	chr19	19672521	19729496	-		ATAD3B	NM_031921		AK097309.1-435	chr19	19675243	19676733	1490	+	46
PCBD2	NM_032151.5	chr5	134240820	134298334	+		MIB2	NM_080875		NM_001170689.1-11	chr5	134240555	134241118	563	+	17
PCDH1	NM_032420.4	chr5	141232665	141257975	-		C10orf105	NM_001164375		AX748323.1-22	chr5	141243615	141244780	1165	-	56
PCDH10	NM_020815.3	chr4	134070448	134075043	+		CDH23	NM_001171931		NM_001171931.1-14	chr4	134071984	134073162	1178	+	24
PCDH17	NM_001040429.3	chr13	58205877	58303445	+		PCDH19	NM_001184880		NM_001184880.1-5	chr13	58206694	58209116	2422	+	23
PCDH8	NM_032949.3	chr13	53417023	53422775	-		DCHS1	NM_003737		NM_003737.2-6	chr13	53420575	53422105	1530	-	11
PCDHA1	NM_031411.2	chr5	140165720	140391929	+		CDH23	NM_001171933		NM_001171934.1-21	chr5	140208274	140209491	1217	+	25
PCDHA2	NM_018905.3	chr5	140174436	140391932	+		CDH23	NM_001171933		NM_001171934.1-21	chr5	140208274	140209491	1217	+	25
PCDHA3	NM_018906.3	chr5	140180641	140391932	+		CDH23	NM_001171933		NM_001171934.1-21	chr5	140208274	140209491	1217	+	25
PCDHA4	NM_018907.4	chr5	140186652	140391932	+		CDH23	NM_001171933		NM_001171934.1-21	chr5	140208274	140209491	1217	+	25
PCDHA5	NM_018908.3	chr5	140201197	140391932	+		CDH23	NM_001171933		NM_001171934.1-21	chr5	140208274	140209491	1217	+	25
PCDHA6	NM_031848.3	chr5	140207544	140210809	+		CDH23	NM_001171933		NM_001171934.1-21	chr5	140208274	140209491	1217	+	25
PCOTH	NM_001014442.4	chr13	24463006	24466242	+		n/a	NR_038939		BX648740.1-55	chr13	24460220	24463377	3157	-	90
PDE6A	NM_000440.3	chr5	149237515	149324356	-		SETDB2	NM_031915		AB209349.1-359	chr5	149301224	149302021	797	+	9
PDF	NM_022341.2	chr16	69360815	69364491	-		CCDC88B	NM_032251		BC151218.1-12	chr16	69363837	69364267	430	+	8
PDIA2	NM_006849.4	chr16	333163	337215	+		TXNDC5	NM_030810		AK098089.1-18	chr16	333880	334659	779	+	18
PEAR1	NM_001353682.2	chr1	156863509	156886221	+		MEGF6	NM_001409		BC146386.1-8	chr1	156877645	156878821	1176	+	20
PER1	NM_002616.3	chr17	8043789	8055722	-		DKFZp586M1120	NM_001130090		AL136926.1-90	chr17	8051366	8052552	1186	+	15
PIDD1	NM_145886.4	chr11	799183	805231	-		LRCH4	NM_002319		AK097420.1-1	chr11	803029	803556	527	-	24
PIN4	NM_001170747.1	chrX	71401525	71483814	+		ERCC6	NM_000124		NM_000124.2-2	chrX	71426800	71428343	1543	-	18
PJA1	NM_001032396.3	chrX	68380588	68385296	-		PJA2	NM_014819		AB383883.1-2	chrX	68381078	68383091	2013	-	87
PKMYT1	NM_001258450.2	chr16	3022808	3030447	-		TNK1	NM_001251902		AK310684.1-4	chr16	3025222	3025814	592	-	20
PLCD1	NM_006225.4	chr3	38048986	38071133	-		PLCB2	NM_004573		NM_004573.2-13	chr3	38051170	38051963	793	-	11
PLCD4	NM_032726.4	chr2	219472621	219501898	+		PAT2	NM_181776		AY162214.1-592	chr2	219496234	219497577	1343	-	23
PLCG1	NM_182811.2	chr20	39766182	39806266	+		PACS2	NM_001100913		NM_001100913.2-44	chr20	39765576	39766388	812	+	10
PLCL1	NM_006226.4	chr2	198669316	199014587	+		PLCH1	NM_001130961		NM_001130961.1-3	chr2	198948670	198950798	2128	+	30
PLCL2	NM_001144382.2	chr3	16926447	17132096	+		FLJ00222	NM_014638		AK074149.1-5	chr3	17052884	17053528	644	+	13
PLEC	NM_201378.4	chr8	144989320	145047697	-		CROCC	NM_014675		NM_014675.3-34	chr8	144995962	145000040	4078	-	52
PLXND1	NM_015103.2	chr3	129274055	129325582	-		PLXNB3	NM_005393		AY927551.1-6	chr3	129284176	129284481	305	-	41
POC1B	NM_001199777.2	chr12	89813494	89919207	-		GALNT14	NM_001253827		NM_001253827.1-7	chr12	89917007	89917927	920	-	35
POC1B-GALNT4	NM_001199782.1	chr12	89913188	89920039	-		GALNT14	NM_001253827		NM_001253827.1-7	chr12	89917007	89917927	920	-	35
POLR2J2	NM_032959.6	chr7	102277194	102312182	-		n/a	noRefSeq		BC108268.1-23	chr7	102291865	102292821	956	-	86
POLR2J3	NM_001097615.2	chr7	102178365	102213068	-		n/a	noRefSeq		BC108268.1-22	chr7	102192772	102193728	956	-	86
POM121	NM_001257190.3	chr7	72349927	72421998	+		POM121C	NM_001099415		AK127026.1-270	chr7	72414284	72418837	4553	+	97
POTEE	NM_001083538.2	chr2	131975882	132022851	+		ACTL6B	NM_016188		NM_016188.4-33	chr2	132021103	132022220	1117	+	69
POTEF	NM_001099771.2	chr2	130831107	130886795	-		ACTL6B	NM_016188		NM_016188.4-30	chr2	130831852	130832969	1117	-	69
POU2F2	NM_001207025.3	chr19	42590274	42636598	-		POU5F1	NM_203289		HQ122659.1-9	chr19	42599501	42600084	583	-	23
POU4F1	NM_006237.4	chr13	79172496	79177687	-		POU2F2	NM_001207026		NM_001207026.1-8	chr13	79175563	79176020	457	-	26
POU4F2	NM_004575.3	chr4	147560044	147563626	+		POU2F2	NM_001207026		NM_001207026.1-15	chr4	147561349	147561941	592	+	32
POU4F3	NM_002700.3	chr5	145718401	145721291	+		POU2F2	NM_001207025		NM_001247994.1-12	chr5	145719416	145719988	572	+	8
PPA1	NM_021129.4	chr10	71962590	71993185	-		PPA2	NM_176869		NM_176867.3-126	chr10	71968550	71969451	901	-	67
PPAN-P2RY11	NM_001198690.2	chr19	10217037	10226048	+		TACR2	NM_001057		BC033742.1-15	chr19	10224406	10225087	681	+	29
PPL	NM_002705.5	chr16	4932507	4987149	-		CEP131	NM_014984		NM_014984.2-15	chr16	4934051	4935829	1778	-	44
PPP1R13L	NM_006663.4	chr19	45882895	45908327	-		GLB1L3	NM_001080407		AK124514.1-451	chr19	45900778	45902067	1289	+	26
PPP1R27	NM_001007533.4	chr17	79791367	79792926	-		TONSL	NM_013432		AB209126.1-75	chr17	79792380	79793691	1311	-	16
PPP1R37	NM_019121.2	chr19	45596436	45650543	+		RANGAP1	NM_002883		BC048990.1-54	chr19	45647302	45648581	1279	+	29
PPP1R9B	NM_032595.5	chr17	48211100	48228038	-		MNX1	NM_005515		NM_005515.3-38	chr17	48226382	48227713	1331	-	50
PRAMEF13	NM_001291380.1	chr1	13447413	13452656	-		PRAMEF22	NM_001100631		NM_001100631.1-46	chr1	13450526	13450842	316	-	21
PRAMEF14	NM_001024661.2	chr1	13668268	13673511	-		PRAMEF12	NM_001080830		NM_001080830.1-66	chr1	13671381	13671713	332	-	18
PRELP	NM_201348.2	chr1	203444933	203460480	+		PODNL1	NM_024825		NM_001146254.1-50	chr1	203452483	203453368	885	+	24
PRKAA1	NM_206907.3	chr5	40759480	40798297	-		CSNK2A1	NM_001895		DQ354583.1-161	chr5	40771310	40771916	606	-	33
PRKACA	NM_207518.3	chr19	14202499	14225003	-		CAMK2G	NM_172171		AK131199.1-321	chr19	14206868	14208705	1837	-	62
PRKAR2B	NM_002736.3	chr7	106685149	106802256	+		ISL2	NM_145805		AB593133.1-10	chr7	106685002	106685426	424	+	12
PROC	NM_000312.3	chr2	128175995	128186822	+		CTRB2	NM_001025200		AK225933.1-32	chr2	128185880	128186404	524	+	51
PRPH	NM_006262.4	chr12	49688929	49692469	+		LMNB2	NM_032737		NM_032737.3-9	chr12	49689271	49691375	2104	+	19
PRRC2C	NM_015172.4	chr1	171454668	171562650	+		RBM25	NM_021239		NM_021239.2-1	chr1	171501520	171502092	572	+	11
PRSS22	NM_022119.4	chr16	2902730	2908171	-		PRSS45	NM_199183		AK128390.1-19	chr16	2905909	2906254	345	-	9
PSKH1	NM_006742.3	chr16	67927156	67963579	+		CAMK2A	NM_015981		NM_015981.3-5	chr16	67942809	67943579	770	+	13
PSKH2	NM_033126.3	chr8	87059337	87081897	-		CAMK1	NM_003656		NM_003656.4-30	chr8	87076206	87076864	658	-	42
PTGES2	NM_198938.2	chr9	130882971	130890741	-		EXOC3L2	NM_138568		AX748143.1-773	chr9	130882618	130884191	1573	+	65
PTH2R	NM_001371905.1	chr2	209224415	209359231	+		ARPC1B	NM_005720		NM_005720.3-2	chr2	209224851	209226171	1320	-	83
PVALEF	NM_001354639.2	chr17	79139306	79156966	+		VEGFB	NM_003377		NM_001243733.1-3	chr17	79139256	79140070	814	-	40
PXDN	NM_012293.3	chr2	1635658	1748287	-		MPO	NM_000250		NM_000250.1-8	chr2	1651894	1653392	1498	-	43
PXDNL	NM_144651.5	chr8	52232136	52722005	-		EPX	NM_000502		NM_000502.4-12	chr8	52320703	52322008	1305	-	43
PYY	NM_004160.5	chr17	42030100	42081837	-		PYY2	NR_003064		NR_003064.2-2	chr17	42030106	42031539	1433	-	98
RAB10	NM_016131.5	chr2	26256952	26360323	+		RAB21	NM_014999		NM_014999.2-602	chr2	26332635	26333882	1247	+	36
RAB11A	NM_001206836.2	chr15	66161828	66184327	+		RAB2B	NM_032846		NM_032846.3-378	chr15	66169657	66171648	1991	+	45
RAB11B	NM_004218.4	chr19	8455243	8469318	+		RAB37	NM_001006638		NM_001006638.2-207	chr19	8464725	8466265	1540	+	43
RAB11FIP3	NM_014700.4	chr16	475648	573011	+		PKD1	NM_001009944		NM_000296.3-1	chr16	475664	476774	1110	+	7
RAB26	NM_001308053.1	chr16	2198144	2204166	+		RAB2B	NM_001163380		NM_001163380.1-411	chr16	2201689	2202387	698	+	22
RAB37	NM_175738.5	chr17	72667269	72743474	+		n/a	NR_037775		AK302147.1-30	chr17	72738772	72739324	552	+	46
RAB39A	NM_017516.3	chr11	107799173	107834208	+		RAB2B	NM_001163380		NM_001163380.1-222	chr11	107832662	107834097	1435	+	30
RAB3A	NM_002866.5	chr19	18307593	18314852	-		RAB11B	NM_004218		AK297498.1-124	chr19	18310846	18313515	2669	-	67
RAB42	NM_001193532.2	chr1	28919006	28921955	+		RAB11B	NM_004218		AK297498.1-2	chr1	28918990	28919985	995	+	90
RANBP2	NM_006267.5	chr2	109335937	109402265	+		RANBP1	NM_002882		NM_002882.2-7	chr2	109380497	109380895	398	+	44
RANBP6	NM_012416.4	chr9	6011024	6015624	-		IPO5	NM_002271		U72761.1-4	chr9	6012289	6015582	3293	-	99
RAP2A	NM_021033.7	chr13	98086422	98121382	+		RASL12	NM_016563		NM_016563.2-2	chr13	98086502	98087004	502	+	18
RAP2C	NM_001271186.2	chrX	131337052	131353475	-		RAP1A	NM_002884		NM_001010935.1-25	chrX	131351050	131351298	248	-	13
RASGRF1	NM_001145648.2	chr15	79252292	79383122	-		PHETA1	NM_001177996		NM_144671.4-2	chr15	79382627	79383222	595	-	16
RASGRP2	NM_001098671.2	chr11	64494382	64511614	-		RASGRP4	NM_170604		NM_001146206.1-143	chr11	64506310	64507583	1273	-	40
RASGRP4	NM_001146206.1	chr19	38899697	38916945	-		CROCCP3	NR_023386		NR_023386.1-204	chr19	38905542	38906716	1174	-	17
RBM46	NM_001277173.1	chr4	155702656	155749965	+		A1CF	NM_001198819		NM_001198818.1-7	chr4	155717955	155720707	2752	+	12
RBM47	NM_019027.4	chr4	40425296	40518002	-		A1CF	NM_001198819		NM_001198818.1-6	chr4	40439945	40440829	884	-	9
RBMX	NM_001164803.2	chrX	135951350	135962884	-		TTTY11	NR_001548		NR_001548.2-8	chrX	135956222	135956642	420	-	47
RCVRN	NM_002903.3	chr17	9799636	9808588	-		HPCAL1	NM_001258359		NM_134421.2-6	chr17	9808120	9808723	603	-	29
RDH14	NM_020905.4	chr2	18735988	18741919	-		RDH11	NM_016026		CR457180.1-5	chr2	18736461	18737076	615	-	61
RELB	NM_006509.4	chr19	45504721	45541450	+		NFKB2	NM_001261403		X61499.1-135	chr19	45528763	45529501	738	+	31
RFPL3	NM_006604.2	chr22	32750871	32757148	+		ERMAP	NM_001017922		AK125447.1-51	chr22	32756061	32756721	660	+	19
RGPD1	NM_001024457.3	chr2	87144737	87241099	+		RANBP2	NM_006267		AY170822.1-58	chr2	87213997	87214387	390	+	17
RGPD2	NM_001078170.2	chr2	88056716	88125286	-		RANBP2	NM_006267		AY170822.1-61	chr2	88082177	88082622	445	-	20
RGPD3	NM_001144013.1	chr2	107021135	107084801	-		RANBP2	NM_006267		AY170823.1-86	chr2	107040915	107041525	610	-	25
RGPD4	NM_182588.2	chr2	108443387	108509000	+		RANBP2	NM_006267		AY170822.1-67	chr2	108487357	108487967	610	+	26
RGPD5	NM_005054.3	chr2	110551881	110615282	+		RANBP2	NM_006267		AK025711.1-70	chr2	110593743	110595084	1341	+	20
RGPD6	NM_001123363.3	chr2	111271378	111336309	-		RANBP2	NM_006267		AY170822.1-78	chr2	111291576	111292021	445	-	19
RGS14	NM_006480.5	chr5	176784924	176799597	+		DDX11	NM_152438		AK024117.1-560	chr5	176798913	176800090	1177	+	23
RGS3	NM_130795.4	chr9	116263786	116360018	+		RGS11	NM_003834		AK091701.1-7	chr9	116358933	116359386	453	+	16
RHOT2	NM_138769.3	chr16	718131	724171	+		FCN2	NM_004108		E10706.1-5	chr16	722309	722725	416	+	32
RHOV	NM_133639.4	chr15	41164411	41166432	-		RAC2	NM_002872		BT006919.1-13	chr15	41165320	41166251	931	-	95
RIOX1	NM_024644.5	chr14	73957637	73960098	+		RIOX2	NM_001042533		NM_001042533.2-2	chr14	73958675	73959088	413	+	7
RIPK4	NM_020639.3	chr21	43159532	43187212	-		MIB2	NM_080875		AK098785.1-9	chr21	43161127	43162063	936	-	26
RNF130	NM_018434.6	chr5	179382066	179498759	-		RNF149	NM_173647		AK129799.1-316	chr5	179404570	179405287	717	-	33
RNF139	NM_007218.3	chr8	125487007	125500859	+		RNF145	NM_001199383		NM_001199380.1-4	chr8	125498883	125499647	764	+	20
RNF165	NM_152470.3	chr18	43913980	44043103	+		PLCB3	NM_000932		Z26649.1-6	chr18	44013156	44013578	422	-	9
RNF187	NM_001010858.3	chr1	228675082	228683889	+		TRIM72	NM_001008274		NM_001008274.3-30	chr1	228674996	228675564	568	+	23
RORA	NM_002943.3	chr15	60780482	60919729	-		CYCS	NM_018947		BC067222.1-20	chr15	60850218	60851163	945	+	90
RP1L1	NM_178857.6	chr8	10463858	10512653	-		TARS2	NM_025150		NR_073513.1-959	chr8	10470156	10471318	1162	+	38
RPL36A-HNRNPH2	NM_001199973.2	chrX	100645998	100669121	+		HNRNPH1	NM_001257293		NM_001257293.1-17	chrX	100666973	100669117	2144	+	91
RPS29	NM_001030001.4	chr14	50037705	50053098	-		RPL32	NM_001007074		X03342.1-10	chr14	50044052	50044537	485	-	93
RPS6KA1	NM_001006665.2	chr1	26872332	26901516	+		PHKG1	NM_001258459		AK309503.1-16	chr1	26887236	26888716	1480	+	73
RRAD	NM_001128850.1	chr16	66955581	66959439	-		MRAS	NM_012219		NM_012219.4-105	chr16	66957428	66958523	1095	-	14
RSPH14	NM_014433.3	chr22	23401592	23484177	-		GNAS	NM_080425		NM_001077490.1-14	chr22	23437987	23438604	617	+	13
RXRG	NM_006917.5	chr1	165370158	165414363	-		NR1H4	NM_001206977		NM_001206977.1-8	chr1	165386287	165387338	1051	-	31
SALL3	NM_171999.3	chr18	76740274	76758969	+		ZFPM1	NM_153813		NM_153813.2-13	chr18	76753979	76754840	861	+	22
SAMD13	NM_001010971.3	chr1	84764220	84816481	+		DNAJB6	NM_058246		NM_058246.3-3	chr1	84810356	84810927	571	+	22
SAPCD2	NM_178448.4	chr9	139956578	139965009	-		FLJ00378	NM_152643		AK090457.1-4	chr9	139964313	139964939	626	-	12
SBK2	NM_001370096.2	chr19	56039977	56048500	-		CAMK2A	NM_015981		AK308853.1-140	chr19	56040599	56041611	1012	-	56
SCARA3	NM_016240.3	chr8	27491418	27530535	+		COL9A2	NM_001852		BC041479.1-34	chr8	27528415	27528872	457	+	13
SCARF2	NM_153334.7	chr22	20778873	20792112	-		MEGF6	NM_001409		BC146386.1-31	chr22	20785030	20786149	1119	-	18
SCN4A	NM_000334.4	chr17	62015913	62050278	-		n/a	NR_045725		A22930.1-6	chr17	62018575	62019293	718	-	41
SCO2	NM_001169111.1	chr22	50961996	50964033	-		SCO1	NM_004589		NM_004589.2-3	chr22	50962107	50962489	382	-	21
SCP2	NM_001330587.1	chr1	53392900	53459904	+		RRAS2	NM_012250		NM_001177314.1-1	chr1	53457450	53459375	1925	-	93
SCRIB	NM_015356.5	chr8	144873094	144897943	-		PRR7	NM_030567		NM_030567.4-4	chr8	144874427	144875052	625	-	35
SCX	NM_001080514.3	chr8	145321355	145323384	+		TCF15	NM_004609		NM_004609.3-28	chr8	145321507	145322306	799	+	59
SDF4	NM_016547.2	chr1	1152287	1167447	-		ATAD3B	NM_031921		AK097309.1-2	chr1	1158771	1160308	1537	-	48
SDR42E1	NM_145168.3	chr16	82022459	82045075	-		NSDHL	NM_001129765		AK026549.1-2	chr16	82032870	82033607	737	-	35
SEPHS2	NM_012248.4	chr16	30454951	30457195	-		SEPHS1	NM_012247		DQ894137.2-3	chr16	30455756	30456907	1151	-	89
SEPTIN6	NM_145800.4	chrX	118749686	118827131	-		SEPTIN7P2	NR_024271		NR_024271.1-279	chrX	118783558	118784063	505	-	16
SERPINB5	NM_002639.5	chr18	61144190	61172318	+		SERPINB6	NM_004568		AK122895.1-556	chr18	61169368	61170956	1588	+	58
SERPINC1	NM_001365052.1	chr1	173872656	173886465	-		SERPINE2	NR_073116		NR_073116.1-1	chr1	173878697	173879086	389	-	13
SFTPA1	NM_005411.5	chr10	81370694	81375199	+		COL3A1	NM_000090		E10600.1-6	chr10	81371669	81372197	528	+	8
SGPP1	NM_030791.4	chr14	64150933	64194783	-		SGPP2	NM_152386		NM_152386.2-1	chr14	64193992	64194643	651	-	44
SHISA5	NM_001272067.1	chr3	48509196	48542247	-		n/a	noRefSeq		BX648024.1-327	chr3	48520298	48521614	1316	+	31
SLC12A3	NM_000339.3	chr16	56899118	56949762	+		SLC12A4	NM_001145961		BC035480.1-95	chr16	56903247	56906694	3447	+	22
SLC12A9	NM_001363494.1	chr7	100424490	100464634	+		SLC12A4	NM_001145961		BC035480.1-257	chr7	100451350	100452380	1030	+	23
SLC24A1	NM_001301033.2	chr15	65903687	65953340	+		SLC24A4	NM_153648		NM_153648.3-105	chr15	65917732	65918243	511	+	5
SLC24A2	NM_020344.3	chr9	19507449	19787017	-		SLC24A4	NM_153647		NM_153647.3-349	chr9	19785919	19786539	620	-	6
SLC25A29	NM_001352820.2	chr14	100757452	100772781	-		SLC25A45	NM_182556		AK091190.1-339	chr14	100758656	100760392	1736	-	41
SLC25A31	NM_031291.4	chr4	128651554	128695447	+		SLC25A18	NM_031481		AK309110.1-202	chr4	128651885	128652777	892	+	30
SLC25A47	NM_001350877.2	chr14	100789675	100796758	+		SLC25A45	NM_182556		AK091190.1-340	chr14	100794522	100795945	1423	+	34
SLC25A5	NM_001152.5	chrX	118602406	118605359	+		SLC25A31	NM_031291		CU692469.1-18	chrX	118603638	118604112	474	-	38
SLC25A6	NM_001636.4	chrX	1505044	1511006	-		SLC25A31	NM_031291		NM_031291.2-18	chrX	1508131	1510890	2759	-	32
SLC26A1	NM_022042.4	chr4	981444	987192	-		SLC26A6	NM_001040454		EU832127.1-4	chr4	983066	985398	2332	-	62
SLC28A1	NM_004213.5	chr15	85427892	85489029	+		ACY1	NM_000666		AK298274.1-239	chr15	85448461	85449557	1096	+	49
SLC39A2	NM_001256588.2	chr14	21467451	21470030	+		SLC39A1	NM_014437		NM_014437.4-77	chr14	21468613	21469666	1053	+	38
SLC39A3	NM_144564.5	chr19	2732521	2740015	-		SLC39A1	NM_014437		NM_014437.4-128	chr19	2732740	2733956	1216	-	42
SLC4A2	NM_001199694.2	chr7	150759728	150773614	+		SLC4A8	NM_001258403		NM_001258403.1-181	chr7	150764958	150769664	4706	+	34
SLC7A4	NM_004173.3	chr22	21383006	21386850	-		SLC7A2	NM_001008539		NM_001008539.3-4	chr22	21385101	21386015	914	-	11
SLC7A6	NM_003983.6	chr16	68298428	68335722	+		SLC7A10	NM_019849		NM_019849.2-6	chr16	68308748	68309143	395	+	19
SLC7A7	NM_001126106.2	chr14	23242430	23289020	-		SLC7A10	NM_019849		NM_019849.2-2	chr14	23282112	23282541	429	-	21
SLC8A1	NM_001351487.2	chr2	40324409	40679230	-		SLC8A2	NM_015063		NM_015063.2-8	chr2	40655603	40657270	1667	-	30
SLC9A2	NM_003048.6	chr2	103236011	103327814	+		SLC9A3	NM_004174		BC011555.1-193	chr2	103236369	103237614	1245	+	58
SLC9A3R2	NM_001130012.3	chr16	2076902	2089027	+		SLC9A3R1	NM_004252		AK094467.1-3	chr16	2076712	2077212	500	+	31
SMCHD1	NM_015295.2	chr18	2655885	2805015	+		KIN	NM_012311		AK309059.1-237	chr18	2796040	2796814	774	+	34
SNRK	NM_001330750.1	chr3	43328003	43392635	+		MARK2	NM_001039469		NM_001163296.1-37	chr3	43344752	43345290	538	+	11
SNTB2	NM_006750.3	chr16	69221049	69342955	+		PDZD7	NM_001195263		AK225136.1-327	chr16	69221028	69221624	596	+	20
SNX18	NM_001102575.2	chr5	53813588	53842416	+		SNX9	NM_016224		NM_016224.3-2	chr5	53814625	53815404	779	+	17
SNX33	NM_153271.2	chr15	75940252	75954642	+		SNX9	NM_016224		NM_016224.3-1	chr15	75942130	75942918	788	+	17
SOD2	NM_001322817.2	chr6	160100095	160183313	-		WTAPP1	NR_038390		NR_038390.1-19	chr6	160164096	160169968	5872	+	52
SOGA1	NM_199181.2	chr20	35405844	35488276	-		LOC442132	NR_033906		NR_033906.1-292	chr20	35436277	35437227	950	-	26
SP100	NM_003113.4	chr2	231280915	231381242	+		HMGB1	NM_002128		BC067732.1-49	chr2	231379638	231380801	1163	+	94
SPATA31A1	NM_001085452.4	chr9	39355665	39361959	+		C5orf60	NM_001142306		NM_001142306.1-479	chr9	39355659	39356885	1226	+	79
SPATA31A3	NM_001083124.1	chr9	40700290	40706537	+		C5orf60	NM_001142306		NM_001142306.1-483	chr9	40700251	40701466	1215	+	79
SPATA31A5	NM_001113541.1	chr9	41500678	41506925	+		C5orf60	NM_001142306		NM_001142306.1-488	chr9	41500639	41501851	1212	+	79
SPATA31A7	NM_015667.2	chr9	65503365	65509610	-		C5orf60	NM_001142306		NM_001142306.1-493	chr9	65508436	65509649	1213	-	79
SPATA31D1	NM_001001670.3	chr9	84603686	84610168	+		SPATA31A3	NM_001083124		NM_001083124.1-36	chr9	84605676	84610134	4458	+	87
SPATA31D3	NM_207416.2	chr9	84558414	84565009	+		SPATA31A3	NM_001083124		NM_001083124.1-34	chr9	84560450	84564971	4521	+	88
SPATA31D4	NM_001145197.1	chr9	84543342	84549913	+		SPATA31A3	NM_001083124		NM_001083124.1-33	chr9	84545358	84549898	4540	+	88
SPDYE1	NM_175064.2	chr7	44040488	44049723	+		PHYHD1	NM_001100876		NM_001100876.1-586	chr7	44046664	44047697	1033	-	34
SPDYE2	NM_001031618.3	chr7	102191678	102202757	+		n/a	noRefSeq		BC108268.1-22	chr7	102192772	102193728	956	-	86
SPDYE2B	NM_001166339.1	chr7	102290771	102301847	+		n/a	noRefSeq		BC108268.1-23	chr7	102291865	102292821	956	-	86
SPDYE3	NM_001004351.5	chr7	99905324	99919819	+		PHYHD1	NM_001100876		NM_174933.3-604	chr7	99916985	99917963	978	-	29
SPDYE6	NM_001146210.4	chr7	101986185	101996889	-		n/a	noRefSeq		BC108268.1-21	chr7	101996442	101997398	956	+	86
SPNS3	NM_001320449.2	chr17	4337234	4391499	+		SPNS1	NM_032038		AK289787.1-232	chr17	4337219	4337960	741	+	47
SPOUT1	NM_016390.4	chr9	131581929	131592073	-		VAC14-AS1	NR_034083		NR_034083.1-488	chr9	131587176	131587908	732	+	26
SPTBN1	NM_003128.3	chr2	54683463	54898583	+		SPTBN2	NM_006946		BC131819.1-4	chr2	54856220	54856969	749	+	33
SPTBN4	NM_020971.3	chr19	40972907	41082370	+		CARNS1	NM_020811		NM_020811.1-5	chr19	41018571	41019309	738	+	15
SPTBN5	NM_016642.4	chr15	42140343	42186251	-		TONSL	NM_013432		AB209126.1-53	chr15	42149472	42150497	1025	-	14
SRARP	NM_178840.4	chr1	16330730	16335302	+		NCAPD2	NM_014865		AK125155.1-2	chr1	16330474	16331223	749	+	21
SRSF8	NM_032102.3	chr11	94800040	94804387	+		SRSF2	NM_003016		NR_036608.1-4	chr11	94800227	94802261	2034	+	86
SSC5D	NM_001195267.2	chr19	55999802	56015708	+		SSC4D	NM_080744		NM_080744.1-62	chr19	56001148	56002519	1371	+	35
STK36	NM_015690.5	chr2	219536808	219567438	+		AKT2	NM_001243028		AK055779.1-483	chr2	219539312	219540214	902	+	19
SULT1A1	NM_177534.2	chr16	28616907	28620649	-		CD320	NM_016579		BC036814.1-249	chr16	28616618	28617337	719	+	39
SULT2B1	NM_177973.2	chr19	49055428	49102680	+		SULT1A3	NM_177552		NM_177552.3-132	chr19	49094863	49095575	712	+	49
SYNM	NM_015286.6	chr15	99645285	99675798	+		PRPH	NM_006262		NM_006262.3-75	chr15	99645434	99646187	753	+	37
SYT6	NM_001366226.1	chr1	114631913	114696491	-		SYT5	NM_003180		Y19236.1-1	chr1	114680195	114680588	393	-	85
SYT8	NM_138567.5	chr11	1855656	1858751	+		SYT5	NM_003180		BC033683.1-5	chr11	1857590	1858373	783	+	57
SYTL1	NM_032872.3	chr1	27668512	27680423	+		NDUFS7	NM_024407		AK094875.1-21	chr1	27671427	27672569	1142	+	58
TBC1D26	NM_178571.4	chr17	15635590	15648098	+		n/a	noRefSeq		AK128109.1-430	chr17	15640232	15643413	3181	-	71
TBC1D28	NM_001039397.2	chr17	18538841	18547740	-		n/a	noRefSeq		AK128109.1-437	chr17	18539910	18543092	3182	+	72
TBC1D3B	NM_001001417.6	chr17	34493060	34503984	-		n/a	noRefSeq		BC128223.1-161	chr17	34500195	34500838	643	-	55
TBC1D3C	NM_001001418.6	chr17	34581084	34592022	-		n/a	noRefSeq		AK128109.1-453	chr17	34586005	34589377	3372	+	78
TBC1D3F	NM_032258.5	chr17	34797171	34808058	-		n/a	noRefSeq		AK128109.1-455	chr17	34802073	34805440	3367	+	78
TBC1D3H	NM_001123392.3	chr17	34746062	34757007	-		n/a	noRefSeq		BC128223.1-163	chr17	34753252	34753895	643	-	55
TBC1D3L	NM_001369499.1	chr17	36284004	36294915	+		n/a	noRefSeq		BC128223.1-165	chr17	36287115	36287758	643	+	55
TBCE	NM_001287801.2	chr1	235530741	235615756	+		RPS21	NM_001024		NM_001024.3-1	chr1	235596261	235597038	777	+	82
TCF12	NM_001322164.2	chr15	57211642	57582051	+		HNRNPA3	NM_194247		NM_194247.2-47	chr15	57538782	57540288	1506	-	25
TCF4	NM_001243226.3	chr18	52889415	53303188	-		RPL21P28	NM_000982		NR_026911.1-83	chr18	53303019	53303574	555	+	98
TCHH	NM_007113.3	chr1	152078792	152087930	-		CDK11A	NM_024011		NM_024011.2-3	chr1	152082622	152083468	846	-	27
TCHP	NM_001143852.2	chr12	110338078	110355874	+		NOC2L	NM_015658		AK092491.1-142	chr12	110348135	110349036	901	+	44
TCIRG1	NM_006019.4	chr11	67806491	67818362	+		SBNO2	NM_014963		BC052799.1-1	chr11	67811298	67811990	692	+	7
TCTE1	NM_182539.4	chr6	44246470	44265435	-		FLJ00348	NR_075083		AK090431.1-520	chr6	44249945	44250838	893	-	10
TEAD1	NM_021961.6	chr11	12695967	12966284	+		n/a	noRefSeq		AK125355.1-202	chr11	12958654	12959555	901	-	20
THEM5	NM_182578.4	chr1	151819576	151826188	-		LINC01531	NR_040046		NR_040046.1-101	chr1	151825840	151826842	1002	-	20
TLE2	NM_001144762.1	chr19	2997635	3029612	-		HSD11B1L	NM_001267868		BC018336.1-394	chr19	3014083	3014954	871	-	74
TLL2	NM_012465.4	chr10	98124364	98273683	-		ADGRE2	NM_013447		NM_013447.3-29	chr10	98138751	98139609	858	-	7
TMED1	NM_006858.4	chr19	10942742	10946888	-		INCA1	NM_001167986		NM_001167986.1-31	chr19	10945152	10946120	968	+	35
TMPRSS9	NM_182973.2	chr19	2389768	2426256	+		PRSS56	NM_001195129		NM_001195129.1-14	chr19	2424095	2425568	1473	+	27
TMTC2	NM_001320322.1	chr12	83080933	83359750	+		TMTC4	NM_001079669		AF339792.1-1	chr12	83250840	83251313	473	+	14
TNC	NM_002160.4	chr9	117781853	117880436	-		SNED1	NM_001080437		NM_001080437.1-10	chr9	117848142	117849056	914	-	12
TNFRSF12A	NM_016639.3	chr16	3070368	3072384	+		HSD11B1L	NM_001267868		BC018336.1-282	chr16	3069933	3070711	778	-	85
TNXB	NM_001365276.2	chr6_cox_hap2	3479580	3547777	-		ITGB2	NM_000211		L78790.1-12	chr6_cox_hap2	3534273	3534699	426	-	17
TONSL	NM_013432.5	chr8	145654157	145669823	-		NLRP12	NM_144687		AY116204.1-23	chr8	145658621	145659145	524	-	13
TPD52L3	NM_001001874.3	chr9	6328374	6331891	+		TPD52L2	NM_199360		NM_199360.2-7	chr9	6328535	6330179	1644	+	59
TPSAB1	NM_003294.4	chr16	1290705	1292555	+		CTRB1	NM_001906		NM_001906.4-10	chr16	1291182	1292196	1014	+	60
TPSB2	NM_024164.6	chr16	1278335	1280185	-		CTRB1	NM_001906		BT007356.1-8	chr16	1278694	1279709	1015	-	67
TPSD1	NM_012217.3	chr16	1306069	1309009	+		CTRB2	NM_001025200		AK124403.1-12	chr16	1306545	1308452	1907	+	28
TPTEP2-CSNK1E	NM_001289912.2	chr22	38686696	38794920	-		PHKG1	NM_001258459		NM_001258459.1-444	chr22	38695545	38696927	1382	-	52
TRAF3	NM_003300.4	chr14	103243785	103377837	+		TRAF2	NM_021138		NM_021138.3-2	chr14	103371609	103372096	487	+	20
TRAF5	NM_004619.3	chr1	211499956	211548288	+		TRAF2	NM_021138		NM_021138.3-1	chr1	211545559	211546031	472	+	20
TRAPPC6A	NM_024108.3	chr19	45666190	45681495	-		ANKDD1A	NM_182703		NM_182703.3-36	chr19	45668093	45669385	1292	+	33
TRIL	NM_014817.4	chr7	28992973	28997946	-		PODN	NM_001199080		NM_001199080.1-23	chr7	28996612	28997431	819	-	22
TRIM25	NM_005082.5	chr17	54965269	54991410	-		TRIM72	NM_001008274		BC033211.1-300	chr17	54990211	54991353	1142	-	52
TRIM34	NM_001003827.1	chr11	5641173	5665628	+		TRIM72	NM_001008274		BC033211.1-114	chr11	5653586	5654367	781	+	42
TRIM4	NM_033017.4	chr7	99488025	99517153	-		TRIM5	NM_033092		AF220028.1-652	chr7	99515907	99517005	1098	-	58
TRIM43	NM_138800.3	chr2	96257748	96265526	+		TRIM49B	NM_001206626		NM_001206626.1-110	chr2	96261909	96262181	272	+	20
TRIM43B	NM_001164464.1	chr2	96142714	96150479	-		TRIM51HP	NR_038174		NR_038174.2-67	chr2	96146052	96146323	271	-	26
TRIM50	NM_178125.3	chr7	72726531	72742085	-		TRIM72	NM_001008274		BC033211.1-650	chr7	72737390	72738769	1379	-	63
TRIM56	NM_030961.3	chr7	100728761	100741248	+		TRIM47	NM_033452		NM_033452.2-34	chr7	100730636	100731655	1019	+	39
TRIM61	NM_001012414.3	chr4	165875597	165898809	-		TRIM6	NM_001003818		NM_058166.4-471	chr4	165889019	165891141	2122	-	44
TRIM6-TRIM34	NM_001003819.4	chr11	5617866	5665628	+		TRIM72	NM_001008274		BC033211.1-114	chr11	5653586	5654367	781	+	42
TRIM74	NM_198853.3	chr7	72430015	72439997	-		RABEP2	NM_024816		BC027584.1-289	chr7	72429101	72430736	1635	-	50
TRIP6	NM_003302.3	chr7	100465008	100471076	+		AJUBA	NM_032876		NM_032876.4-20	chr7	100469173	100469955	782	+	12
TRPC4	NM_003306.3	chr13	38206199	38443909	-		TRPC1	NM_001251845		NM_001251845.1-2	chr13	38320073	38320553	480	-	11
TSBP1	NM_001286474.2	chr6	32260474	32339680	-		ERMAP	NM_001017922		AK295704.1-672	chr6	32337150	32337764	614	-	37
TSEN34	NM_001077446.4	chr19	54695158	54698390	+		PLEKHH3	NM_024927		NR_073574.1-6	chr19	54695008	54695407	399	-	15
TSPAN10	NM_001290212.1	chr17	79604196	79615785	+		C33 antigen	NM_002231		S48196.1-384	chr17	79612205	79613415	1210	+	64
TSPAN17	NM_001366492.2	chr5	176074484	176086052	+		CD37	NM_001774		AL833693.1-587	chr5	176082606	176083846	1240	+	32
TSPAN31	NM_001330169.2	chr12	58138821	58144002	+		RSKR	NM_001174103		NM_001174103.1-298	chr12	58143486	58144846	1360	-	26
TSSK2	NM_053006.5	chr22	19118820	19120135	+		MARK4	NM_031417		NM_001199867.1-25	chr22	19118964	19119610	646	+	11
TSSK3	NM_052841.4	chr1	32828139	32829913	+		CAMK2A	NM_015981		AK308853.1-6	chr1	32829393	32830219	826	+	45
TUBA1B	NM_006082.3	chr12	49521564	49525178	-		TUBB4B	NM_006088		NM_006088.5-16	chr12	49521748	49523487	1739	-	77
TUBB	NM_178014.4	chr6_apd_hap1	1999770	2004841	+		TUBA4A	NM_006000		NM_006000.1-60	chr6_apd_hap1	2002769	2003713	944	+	56
TUBB1	NM_030773.4	chr20	57594483	57601709	+		TUBA4A	NM_006000		NM_006000.1-38	chr20	57598545	57599693	1148	+	66
TUBB2A	NM_001069.3	chr6	3153899	3157778	-		TUBG2	NM_016437		CU679432.1-6	chr6	3154214	3154828	614	+	58
TUBB2B	NM_178012.5	chr6	3224510	3227887	-		TUBG2	NM_016437		CU679432.1-8	chr6	3225102	3225743	641	+	61
TUBB3	NM_001197181.2	chr16	89988332	90002505	+		TUBG2	NM_016437		BC052283.1-3	chr16	90001377	90002079	702	+	36
TUBB4A	NM_001289127.1	chr19	6494329	6502859	-		TUBG2	NM_016437		AK225134.1-8	chr19	6495289	6502378	7089	-	74
TUBB4B	NM_006088.6	chr9	140135738	140138159	+		TUBG1	NM_001070		NM_001070.4-37	chr9	140136955	140137571	616	+	29
TUBB6	NM_001303526.2	chr18	12308239	12326615	+		TUBG2	NM_016437		NM_016437.2-7	chr18	12325167	12326008	841	+	41
TUBB8	NM_177987.2	chr10	92827	95178	-		TUBA3E	NM_207312		NM_207312.2-8	chr10	92981	94667	1686	-	70
TXNDC2	NM_032243.6	chr18	9885969	9889272	+		TXN	NM_003329		NM_003329.3-5	chr18	9887822	9888288	466	+	51
UBE2E2	NM_152653.4	chr3	23244817	23633285	+		UBE2D3	NM_181892		AK127304.1-294	chr3	23573336	23574196	860	+	16
UBE2QL1	NM_001145161.3	chr5	6448971	6496836	+		UBE2Q1	NM_017582		BC009286.2-13	chr5	6449054	6449373	319	+	31
UBQLN2	NM_013444.3	chrX	56590025	56593443	+		UBQLN4	NM_020131		AB587408.1-18	chrX	56590401	56592177	1776	+	87
UBXN2B	NM_001077619.2	chr8	59323919	59364060	+		GTF2IRD2	NM_173537		AY336980.1-794	chr8	59323052	59323999	947	-	56
UGT1A10	NM_019075.2	chr2	234545122	234681951	+		DNAJB6	NM_005494		NM_005494.2-24	chr2	234662676	234663918	1242	-	77
UGT1A3	NM_019093.2	chr2	234637772	234681945	+		DNAJB6	NM_005494		NM_005494.2-24	chr2	234662676	234663918	1242	-	77
UGT1A4	NM_007120.3	chr2	234627381	234681946	+		DNAJB6	NM_005494		NM_005494.2-24	chr2	234662676	234663918	1242	-	77
UGT1A5	NM_019078.1	chr2	234621637	234681945	+		DNAJB6	NM_005494		NM_005494.2-24	chr2	234662676	234663918	1242	-	77
UGT1A6	NM_205862.2	chr2	234600315	234681946	+		DNAJB6	NM_005494		NM_005494.2-24	chr2	234662676	234663918	1242	-	77
UGT1A7	NM_019077.2	chr2	234590583	234681945	+		DNAJB6	NM_005494		NM_005494.2-24	chr2	234662676	234663918	1242	-	77
UGT1A8	NM_019076.4	chr2	234526290	234681945	+		DNAJB6	NM_005494		NM_005494.2-24	chr2	234662676	234663918	1242	-	77
UGT1A9	NM_021027.3	chr2	234580543	234681946	+		DNAJB6	NM_005494		NM_005494.2-24	chr2	234662676	234663918	1242	-	77
UNCX	NM_001080461.3	chr7	1272507	1276962	+		RAX	NM_013435		BC156201.1-66	chr7	1272757	1273561	804	+	67
USP6	NM_001304284.2	chr17	5019326	5078286	+		n/a	noRefSeq		AK128109.1-426	chr17	5035166	5038528	3362	-	77
UTP14C	NM_021645.6	chr13	52598826	52607736	+		UTP14A	NM_006649		NM_006649.3-1	chr13	52602893	52605375	2482	+	96
VIL1	NM_007127.3	chr2	219283845	219318018	+		SCIN	NM_033128		NM_033128.3-472	chr2	219296576	219298177	1601	+	41
VPS16	NM_080413.2	chr20	2821342	2847378	+		ABCB9	NM_001243014		AK027624.1-336	chr20	2843224	2844423	1199	+	27
VWCE	NM_152718.2	chr11	61025757	61062788	-		AQP4-AS1	NR_026908		NR_026908.1-117	chr11	61043588	61044312	724	-	26
WARS2	NM_201263.2	chr1	119573838	119683295	-		ARHGAP1	NM_004308		AK298562.1-42	chr1	119683183	119683953	770	+	41
WDR33	NM_018383.5	chr2	128458600	128568745	-		COL5A1	NM_000093		NM_000093.3-18	chr2	128476940	128477752	812	-	9
WDR45B	NM_019613.4	chr17	80572437	80606320	-		WDR45	NM_007075		NM_007075.3-454	chr17	80575194	80576123	929	-	39
WDR62	NM_001083961.2	chr19	36545798	36596010	+		GPI	NM_000175		AB209575.1-341	chr19	36576679	36578433	1754	+	24
WNT5B	NM_030775.2	chr12	1726221	1756377	+		WNT11	NM_004626		JF800675.1-5	chr12	1754962	1755416	454	+	54
WTAP	NM_004906.5	chr6	160148148	160177351	+		WTAPP1	NR_038390		NR_038390.1-19	chr6	160164096	160169968	5872	+	52
XG	NM_001141919.1	chrX	2670092	2734541	+		XG	NM_003140		Z48510.1-1	chrX	2670131	2670401	270	+	27
XKRX	NM_212559.3	chrX	100168433	100183906	-		n/a	NR_024187		BC041912.1-667	chrX	100182172	100183149	977	+	46
XPNPEP3	NM_022098.4	chr22	41253151	41328819	+		DNAJB6	NM_058246		NM_058246.3-18	chr22	41257064	41258024	960	-	38
XRCC5	NM_021141.4	chr2	216974070	217071016	+		POLH	NM_006502		NM_006502.2-1323	chr2	217006265	217021823	15558	-	12
YIPF3	NM_015388.4	chr6	43479569	43484664	-		PPM1F	NM_014634		BC013798.1-455	chr6	43480883	43482006	1123	+	50
YWHAG	NM_012479.4	chr7	75956115	75988308	-		YWHAQ	NM_006826		AK316158.1-27	chr7	75958903	75959561	658	-	65
YWHAH	NM_003405.4	chr22	32340520	32353590	+		YWHAQ	NM_006826		AK316158.1-20	chr22	32352120	32352782	662	+	65
ZC3H4	NM_015168.2	chr19	47567443	47617033	-		AKR1B10	NM_020299		NM_020299.4-157	chr19	47588586	47589414	828	-	30
ZCCHC14	NM_015144.3	chr16	87439853	87526630	-		KCNH2	NM_172056		NM_172056.2-6	chr16	87525301	87526363	1062	-	24
ZFP14	NM_020917.3	chr19	36825354	36870103	-		LOC100134868	NR_004846		NR_004846.2-894	chr19	36852144	36853142	998	-	51
ZFP69	NM_001320179.2	chr1	40942961	40962015	+		n/a	NR_028594		AK126753.1-19	chr1	40954751	40961734	6983	+	37
ZNF124	NM_001297569.1	chr1	247318290	247335319	-		LOC100134868	NR_004846		NR_004846.2-122	chr1	247321939	247323127	1188	-	47
ZNF135	NM_007134.1	chr19	58570606	58581123	+		ZNF107	NM_016220		BC017809.1-484	chr19	58572558	58573110	552	+	46
ZNF160	NM_001322138.1	chr19	53569866	53606687	-		LOC100134868	NR_004846		NR_004846.2-1006	chr19	53577047	53578427	1380	-	47
ZNF20	NM_021143.4	chr19	12242164	12251165	-		n/a	noRefSeq		BC038849.1-787	chr19	12245691	12247189	1498	-	64
ZNF250	NM_001363100.2	chr8	146102339	146127562	-		PPP1CC	NM_002710		NM_002710.3-11	chr8	146111495	146113496	2001	-	55
ZNF273	NM_021148.2	chr7	64363619	64391955	+		LOC100134868	NR_004846		NR_004846.2-1637	chr7	64377967	64379046	1079	+	43
ZNF28	NM_001369765.1	chr19	53300660	53324886	-		THEM4	NM_053055		AK096211.1-435	chr19	53320343	53321678	1335	+	41
ZNF350	NM_021632.4	chr19	52467592	52490093	-		n/a	NR_026777		BC045697.1-1163	chr19	52468797	52469792	995	-	25
ZNF394	NM_001345968.1	chr7	99084141	99097931	-		n/a	NR_026777		BC045697.1-1988	chr7	99083659	99084792	1133	+	36
ZNF408	NM_024741.3	chr11	46722580	46727462	+		LOC155060	NR_036573		NR_036573.1-86	chr11	46725317	46727088	1771	+	46
ZNF418	NM_001317027.2	chr19	58433249	58446770	-		n/a	noRefSeq		BC021296.2-396	chr19	58441066	58441925	859	-	57
ZNF429	NM_001346912.2	chr19	21688403	21723470	+		LOC100134868	NR_004846		NR_004846.2-847	chr19	21712477	21713008	531	+	25
ZNF439	NM_001348724.1	chr19	11959547	11980306	+		LOC100134868	NR_004846		NR_004846.2-771	chr19	11977031	11977861	830	+	38
ZNF484	NM_001261459.2	chr9	95606476	95640320	-		ZBTB8OS	NM_178547		NM_178547.2-4	chr9	95608051	95608585	534	-	74
ZNF486	NM_052852.4	chr19	20278022	20311297	+		LOC100134868	NR_004846		NR_004846.2-822	chr19	20295182	20295909	727	+	34
ZNF534	NM_001291369.3	chr19	52932400	52955562	+		DUT	NM_001025248		NM_001025248.1-6	chr19	52954454	52955541	1087	+	50
ZNF568	NM_001204839.1	chr19	37407230	37488834	+		LOC100134868	NR_004846		NR_004846.2-909	chr19	37482075	37483416	1341	+	66
ZNF668	NM_001172669.1	chr16	31072163	31076409	-		LOC155060	NR_036573		NR_036573.1-226	chr16	31073067	31074437	1370	-	36
ZNF679	NM_153363.3	chr7	63688851	63727309	+		n/a	NR_028594		AK126753.1-1852	chr7	63720555	63728302	7747	+	46
ZNF703	NM_025069.3	chr8	37553299	37557537	+		RINL	NM_001195833		AK126119.1-15	chr8	37554601	37555067	466	-	17
ZNF724	NM_001355404.2	chr19	23404400	23433196	-		n/a	noRefSeq		BC038849.1-885	chr19	23413676	23415078	1402	-	55
ZNF737	NM_001159293.2	chr19	20720797	20748587	-		LOC100134868	NR_004846		NR_004846.2-834	chr19	20736057	20736623	566	-	31
ZNF789	NM_001350999.1	chr7	99070514	99085217	+		n/a	NR_026777		BC045697.1-1988	chr7	99083659	99084792	1133	+	36
ZNF846	NM_001353800.1	chr19	9863065	9896859	-		TRIM16L	NM_001037330		AL080124.1-332	chr19	9873536	9874092	556	-	40
ZNF85	NM_001256171.1	chr19	21106058	21133503	+		LOC100134868	NR_004846		NR_004846.2-838	chr19	21116838	21117597	759	+	46
ZNF853	NM_017560.3	chr7	6655240	6663921	+		PLIN5	NM_001013706		NM_001013706.2-948	chr7	6653959	6655817	1858	-	58
ZNF93	NM_031218.4	chr19	20011754	20046384	+		LOC100134868	NR_004846		NR_004846.2-816	chr19	20026106	20026667	561	+	31
ZSCAN10	NM_001365273.1	chr16	3138890	3149295	-		LOC155060	NR_036573		NR_036573.1-182	chr16	3139514	3141097	1583	-	45
aRetrotransposed genes (retrogenes) and their characteristics as downloaded from the UCSC Genome Browser (http://genome.ucsc.edu, Retroposed Genes V5)
