# Supplementary material for: Epigenetics of Muscle- and Brain-Specific Expression of KLHL Family Genes
Source: Int J Mol Sci. 2020 Nov 9;21(21):8394. doi: 10.3390/ijms21218394 (PMC7672584; doi:10.3390/ijms21218394)
Supplement: Supplementary file 1 [file ijms-21-08394-s001.zip › Ehrlich_KLHL_Epigen_ Table-Suppl_Table5-Final_10_30_20.xlsx]

## Sheet: Table S5 miRNAs
Table S5. Previous reports of miRNA regulation of KLHL family genes in this study
Gene	miRNA	Encoded protein function	Some disease relationships for the protein	Reference (PMIDb)
ENC1	miR-149	oxidation reduction	Hepatocellular carcinoma (HCC)	24278370
KBTBD11	miR-133b	Unknown	Regulation of E. coli pathogenicity	31670582
KBTBD12	miR-153	Unknown	Spleen-stress resistance	27215075
KEAP1	miR-432a	Stabilizes NRF2	Sqamous cell carcinoma	28760781
KEAP1	miR-223	Ameliorates oxidative stress	None	30466006
KEAP1	miR-200a	Activates NRF2	Breast cancer; reduces cardiotoxicity of doxorubicin	21926171, 31781322
KEAP1	miR-7	Activates NRF2	Protects against MPP+ toxicity	26453926
KEAP1	miR-141	Activates NRF2	HCC cell resistance to 5-fluorouracil (5-FU); ovarian cancer resistance to cisplatin; prevents induced prostatitis; inhibits vascular smooth muscle cell proliferation; ameliorates UV stress	25896253, 23045278, 32897647, 26941030 28061435
KEAP1	miR-141/lnc RNA KRAL	Activates NRF2	Reverses 5-FU resistance in HCC	30119680
KEAP1	miR-24	Unknown	Cardiomyocyte protection	30622671
KEAP1	miRNA-1225	Activates KEAP1/NRF2 signaling	Osteoclastogenesis (related to osteoporosis)	31017694
KEAP1	miRNA-873	Activates KEAP1/NRF2 signaling	Colistin-induced kidney injury	31156435
KEAP1	miR-26b	Unknown	Helps prevent cardiac fibrosis	32104267
KLHL2	miR-181c	Unknown	Post-stroke recovery	31722236
KLHL31	miR-675	Activates FBXO32	Skeletal muscle atrophy	32132660
aIn addition to these, other miRNAs have been identified that are involved in the regulation of KEAP1 RNA levels
bPubmed accession number (https://pubmed.ncbi.nlm.nih.gov/)
